# Supplementary material for: Opioid use and harms associated with a sustained-release tapentadol formulation: a postmarketing study protocol
Source: PubMed Central journal article supplement — BMJ Open. 2018 Mar 23;8(3):e020006. doi: 10.1136/bmjopen-2017-020006 (PMC5875643; doi:10.1136/bmjopen-2017-020006), 2018-03-23
Supplement: bmjopen-2017-020006.draft_revisions.pdf [file bmjopen-2017-020006.draft_revisions.pdf]

# BMJ Open

BMJ Open is committed to open peer review. As part of this commitment we make the peer review history of every article we publish publicly available.

When an article is published we post the peer reviewers' comments and the authors' responses online. We also post the versions of the paper that were used during peer review. These are the versions that the peer review comments apply to.

The versions of the paper that follow are the versions that were submitted during the peer review process. They are not the versions of record or the final published versions. They should not be cited or distributed as the published version of this manuscript.

BMJ Open is an open access journal and the full, final, typeset and author-corrected version of record of the manuscript is available on our site with no access controls, subscription charges or pay-per-view fees (<http://bmjopen.bmj.com>).

If you have any questions on BMJ Open's open peer review process please email [info.bmjopen@bmj.com](mailto:info.bmjopen@bmj.com)

# BMJ Open

## Opioid Use and Harms Associated with a Sustained-Released Tapentadol Formulation: A Post-Marketing Study Protocol

|                               |                                                                                                                                                                                                                                                                                                                                                                                                                                                                                                                |
|-------------------------------|----------------------------------------------------------------------------------------------------------------------------------------------------------------------------------------------------------------------------------------------------------------------------------------------------------------------------------------------------------------------------------------------------------------------------------------------------------------------------------------------------------------|
| Journal:                      | <i>BMJ Open</i>                                                                                                                                                                                                                                                                                                                                                                                                                                                                                                |
| Manuscript ID                 | bmjopen-2017-020006                                                                                                                                                                                                                                                                                                                                                                                                                                                                                            |
| Article Type:                 | Protocol                                                                                                                                                                                                                                                                                                                                                                                                                                                                                                       |
| Date Submitted by the Author: | 09-Oct-2017                                                                                                                                                                                                                                                                                                                                                                                                                                                                                                    |
| Complete List of Authors:     | Peacock, Amy; National Drug and Alcohol Research Centre; School of Medicine<br>Larance, Briony; University of New South Wales, National Drug and Alcohol Research Centre<br>Farrell, Michael; University of New South Wales, National Drug and Alcohol Research Centre<br>Cairns, Rose; University of Sydney, School of Medical Sciences<br>Buckley, Nicholas; University of Sydney, School of Medical Sciences<br>Degenhardt, Louisa; University of New SouthWales, National Drug and Alcohol Research Centre |
| Keywords:                     | tapentadol, pharmaceutical opioid, tamper, Substance misuse < PSYCHIATRY, harm, Overdose                                                                                                                                                                                                                                                                                                                                                                                                                       |
|                               |                                                                                                                                                                                                                                                                                                                                                                                                                                                                                                                |

SCHOLARONE™  
Manuscripts

1  
2  
3  
4  
5  
6  
7  
8  
9

## Opioid Use and Harms Associated with a Sustained-Released Tapentadol Formulation: A Post-Marketing Study Protocol

10 Amy Peacock<sup>1,2</sup>, Briony Larance<sup>1</sup>, Michael Farrell<sup>1</sup>, Rose Cairns<sup>2,4</sup>, Nicholas Buckley<sup>2,4</sup>, & Louisa  
11 Degenhardt<sup>1,5,6,7</sup>

- 12  
13  
14 1. National Drug and Alcohol Research Centre, University of New South Wales, NSW, Australia  
15 2. School of Medicine, University of Tasmania, TAS, Australia  
16 3. NSW Poisons Information Centre, The Children's Hospital at Westmead, NSW, Australia  
17 4. School of Medical Sciences, University of Sydney, Sydney, NSW  
18 5. School of Population and Global Health, University of Melbourne, VIC, Australia  
19 6. Murdoch Children's Research Institute, Australia  
20 7. Department of Global Health, School of Public Health, University of Washington, USA  
21  
22  
23  
24  
25  
26  
27  
28  
29  
30  
31  
32

33 **Word Count:** 2,636

34  
35 **Corresponding author:** Amy Peacock, Research Fellow, National Drug and Alcohol Research Centre,  
36 University of New South Wales, e: [amy.peacock@unsw.edu.au](mailto:amy.peacock@unsw.edu.au), t: +61 2 9385 0333, f: +61 2 9385  
37 0222.  
38  
39  
40  
41  
42  
43  
44  
45  
46  
47  
48  
49  
50  
51  
52  
53  
54  
55  
56  
57  
58  
59  
60

## ABSTRACT

**Introduction:** It has been argued that pharmacologically tapentadol may have lower abuse potential than other pharmaceutical opioids currently available. However, there has been no comprehensive triangulation of data regarding use and harms associated with this formulation. A sustained-release formulation (SRF) of tapentadol (Palexia®) was released in Australia in 2011 and listed for public subsidy in 2013. We summarise here the methods of a post-marketing study which will measure post-introduction: i) population level availability, ii) extra-medical use and diversion, iii) attractiveness for extra-medical use, and iv) associated harms, of tapentadol compared against other pharmaceutical opioids.

**Methods and Analysis:** We evaluated key sources on pharmaceutical use and harms in Australia, and were limited to triangulating data from four sources that disaggregate pharmaceutical opioid formulations and captured the tapentadol SRF. These data sources comprised: i) national pharmaceutical opioid community sales data from 2011-2017, ii) national pharmaceutical opioid poisonings reported to Poison Information Centres from 2011-2017, iii) number of vendors on online marketplaces listing pharmaceutical opioids for sale, and iv) data on pharmaceutical opioid extra-medical use, attractiveness, and harms from interviews with people who inject drugs in Australia.

**Ethics and Dissemination:** Ethics approval is not required for use of pharmaceutical sales data. Ethics approval has been obtained for use of national pharmaceutical opioid poisonings reported to Poison Information Centres (LNR/16/SCHN/44) and for use of online marketplace data and interview data from people who inject drugs (HC12086). Key findings will be published mid-2018 in a peer-reviewed academic journal, and presented at various conferences and professional meetings.

**Keywords:** opioid; tapentadol; overdose; tamper; substance misuse; harm

### STRENGTHS AND LIMITATIONS

- This study will comprise the first published comprehensive assessment of tapentadol SRF use, extra-medical use, attractiveness for extra-medical use, and associated harms.
- The number of data sources is limited relative to other post-marketing studies of pharmaceutical opioids as tapentadol is rarely coded separate to other pharmaceutical opioids in administrative data.
- However, this study will overview a wealth of data from the general population and a group at high risk for extra-medical use, both of which are key to examine when quantifying various impacts of pharmaceutical opioids.
- These findings will have relevance to other countries where tapentadol has recently been introduced or where it may be introduced in the future.

## INTRODUCTION

In the past two decades, there has been an increase in the number of pharmaceutical opioids available, and in the prescribing of these drugs, in several high-income countries, including North America and Australia<sup>1</sup>. Indeed, between 1992-2012 the number of pharmaceutical opioid dispensing episodes increased fifteen-fold in Australia<sup>2</sup>. This increase in availability in Australia has been accompanied by greater rates of extra-medical use, defined as use outside the bounds of a doctor's prescription<sup>3</sup>. The risk of opioid dependence and serious adverse events (e.g., overdose) associated with extra-medical use has made addressing this problem a public health imperative<sup>4,5</sup>.

Opioids differ in the extent to which they are likely to be associated with hazardous patterns of use due to different potencies (i.e., weak to strong opioids), pharmacokinetic characteristics (e.g., rate of metabolism) and propensities for dependence<sup>6</sup>. The need to reduce extra-medical use must also be balanced against the need for access to opioid therapy for pain. Thus, current public health agency strategies to reduce extra-medical pharmaceutical opioid use and chronic pain prescribing guidelines focus on products which have limited or no abuse potential<sup>7,8</sup>.

Tapentadol is a centrally acting opioid analgesic with dual mechanisms of action, specifically  $\mu$ -opioid receptor agonist and noradrenaline reuptake inhibition. This dual action is thought to result in a lower dose required to produce a given level of analgesia<sup>9</sup>. Clinical trials suggest that tapentadol provides equivalent or superior levels of pain relief for acute and chronic pain similar to oxycodone and morphine, with greater gastro-intestinal tolerability in terms of reduced rates of nausea, vomiting, and constipation<sup>10-13</sup>.

A recent review by the World Health Organization's Expert Committee on Drug Dependence<sup>11</sup> concluded that potential for abuse for tapentadol may be similar to or slightly lower than other opioids such as hydromorphone, oxycodone, morphine and tramadol. However, they note that these conclusions are tentative given a lack of data regarding tapentadol "abuse, dependence, diversion, recreational use, or poison control", noting that tapentadol generally does not feature in drug use surveys or surveillance reports. The few studies which have been conducted are based on US samples, and using treatment-seeking populations<sup>14</sup> or evaluation of internet discussions<sup>15,16</sup> and prescribing data<sup>17</sup> to assess extra-medical use, with early indications of rates of abuse and diversion equivalent to hydromorphone and lower than oxycodone and most other strong opioids<sup>14,18</sup>.

1  
2  
3 The immediate release form of tapentadol is registered in Australia for moderate to severe pain,  
4 while the sustained release form is registered for severe pain which requires constant opioid  
5 treatment and for which no other opioid other treatments are adequate<sup>19</sup>. Although a sustained-  
6 release formulation of tapentadol (SRF; Palexia® SR) was released in Australia in 2011, and listed for  
7 subsidy on the Pharmaceutical Benefits Scheme in November 2013<sup>20</sup>, no research into rates into  
8 dispensing, extra-medical use, and associated harms of the tapentadol SRF has been undertaken in  
9 Australia. Given the broader context of rising rates of pharmaceutical opioid use and harms  
10 (including overdose), monitoring new formulations in terms of population level pharmaceutical  
11 opioid use, and extra-medical use amongst high risk populations (e.g., those reporting extra-medical  
12 use of other pharmaceutical use) is critical.

13  
14  
15  
16  
17  
18  
19  
20 This paper outlines the design for a national post-marketing study of use, extra-medical use, and  
21 harms associated with introduction of the tapentadol SRF in Australia. This study will integrate  
22 population and sentinel high-risk population data, including national pharmaceutical opioid sales  
23 data, interviews with people who inject drugs, and national opioid-related poisoning event data.  
24  
25  
26  
27  
28

## 29 **METHODS AND ANALYSIS**

### 30 **Study aims**

31  
32 The overarching aim of this study is to identify extra-medical use and diversion of tapentadol SRF,  
33 attractiveness for extra-medical use, and associated levels of harms compared to these indicators for  
34 other pharmaceutical opioid use. The specific questions we aim to answer are as follows:  
35  
36

- 37 1. What is the population level availability of the tapentadol SRF in Australia relative to other  
38 pharmaceutical opioids?
- 39 2. Are there indications of extra-medical use of the tapentadol SRF (specifically, non-prescribed  
40 use, use via routes that require tampering), and how does this compare to other  
41 pharmaceutical opioids?
- 42 3. What is the relative attractiveness for extra-medical use (i.e., street price) of the tapentadol  
43 SRF, and how does this compare to other pharmaceutical opioids?
- 44 4. Are there indications of associated harm with the tapentadol SRF (specifically, self-reported  
45 non-fatal overdose, as well as intentional poisoning, extra-medical use and abuse as  
46 identified through poison information centre data), and how does this compare to other  
47 pharmaceutical opioids?
- 48  
49  
50  
51  
52  
53  
54  
55  
56  
57  
58  
59  
60

### Study design and setting

This study is being conducted in Australia. There are three main components of this study: analyses of existing routine data sources (2011-2017); analyses of data from monitoring online drug marketplaces (2013-2017); and analyses of cross-sectional data collected from a high-risk sentinel group (people who inject drugs) participating in the Illicit Drug Reporting System (IDRS) in 2016.

Most indicator data sets in Australia do not routinely separate tapentadol from other pharmaceutical opioids, precluding any comparison of population-level availability (see Appendix 1). Five data sources were identified which could provide data specific to pharmaceutical opioid brand, thus allowing analysis of use and harms related to tapentadol SRF. Prescription monitoring programme data, although theoretically useful, only exist in one jurisdiction, where registration is voluntary and implementation is not complete or consistent, and utilisation of this programme irregular. Consequently, four data sources were included in this study: pharmaceutical opioid sales data; poison information centre call data; online drug marketplace data; and interviews with people who inject drugs. **Table 1** outlines the relevant outcome for each data source for each research question.

**\*\*Table 1 approximately here\*\***

#### *Pharmaceutical opioid sales data*

A third-party access request to obtain pharmaceutical sales data in Australia was approved by IMS Health. These data include all pharmaceutical opioid purchases through pharmaceutical wholesalers and manufacturers who sold direct to pharmacies between 2011 and 2017. Data reflects community sales only, excluding sales to hospitals. However, due to the legal requirements for secure storage of pharmaceuticals in pharmacies, and monitoring and recording of opioids depending on their schedule listing, the number of packs sold over a 12 month period closely approximates the number used.

All opioids available in Australia that are indicated for pain can be included and coded according to the World Health Organization's Anatomical Therapeutic Classification system code of A02A 'opioids' and A02B 'other analgesics and antipyretics'. This includes, but is not limited to, tapentadol (N02AX06), buprenorphine (N02AE01), prescription and over-the-counter codeine (N02BA51, N02BE51, N02AA59, R05DA04), dextropropoxyphene (N02AC04, N02AC54), fentanyl (N02AB03), hydromorphone (N02AA03), methadone (N02AC52), morphine (N02AA01), and oxycodone



1  
2  
3 (N02AA05, N02AA55). Injectable formulations are excluded, being mainly prescribed in hospitals,  
4 and formulations of methadone and buprenorphine used solely for the treatment of opioid  
5 dependence are excluded. However, over-the-counter codeine is captured in this data source. IMS  
6 Health data can be provided from January 2011 to December 2017 aggregated monthly broken  
7 down by opioid formulation, brand, strength, and geographic unit.  
8  
9  
10

#### 11 *Poison Information Centre call data*

12  
13 Four Poison Information Centres (PICs) in Australia, based in New South Wales, Queensland, Victoria  
14 and Western Australia, together provide nationwide, round-the-clock poisoning advice to healthcare  
15 professionals and members of the public. National data will be extracted regarding number of cases  
16 of pharmaceutical opioid exposure poisonings (including over-the-counter codeine) reported to PICs.  
17 Specifically, opioid-related calls will only be extracted where the exposure type/intent is coded as  
18 'recreational', so as to identify exposures where pharmaceutical opioids were taken for its  
19 intoxicating effects<sup>21</sup>. Where the intentional exposure subtype is not available or unclear, calls  
20 regarding opioids will undergo a free-text search for markers of extra-medical use and abuse  
21 (defined here as use of a drug in a way or for a purpose outside intended medical use, e.g., excess  
22 quantity, recreational use, use for non-approved purposes), then manually reviewed by PIC staff and  
23 recoded.  
24  
25  
26  
27  
28  
29  
30  
31

32  
33 Unit-level data collected between January 2011 and December 2017 will be extracted. Data fields to  
34 be extracted include call date, age group, gender, state/territory, dose, brand, active ingredients,  
35 and route of exposure.  
36  
37  
38

#### 39 *Online drug marketplace data*

40  
41 An existing surveillance system in Australia monitors availability and types of substances sold online  
42 via the darknet<sup>22 23</sup>. The darknet is accessible only via The Onion Router (TOR), software that enables  
43 anonymous communication. Cryptomarkets (markets operating on the darknet) have been accessed  
44 weekly since 2013 using a dedicated user account. Exhaustive snapshots of each accessible  
45 marketplace are taken, including details of vendor name, listing description and, where possible,  
46 country of origin. For this study, the number of vendors listing illicit pharmaceutical opioids for sale  
47 on cryptomarkets between January 2013 and December 2017 will be extracted by brand and by  
48 month. This data cannot provide any information about consumers who are buying drugs on the  
49 cryptomarkets, or any data on the total number of sales via these sites. However, it does yield timely  
50 and sensitive information regarding drug availability online.  
51  
52  
53  
54  
55  
56  
57  
58  
59  
60

### *Illicit Drug Reporting System data*

The Illicit Drug Reporting System (IDRS) is a national illicit drug monitoring system, one part of which comprises annual interviews with ~900 people who inject drugs interviewed in each capital city in Australia. Participants are recruited using multiple methods, including advertisements in street press, newspapers, treatment agencies, needle and syringe programs, and peer referral. To be eligible to participate, participants need to be at least 17 years of age; have injected at least monthly during the six months preceding interview; and have been a resident for at least 12 months in the capital city in which they are interviewed. The interview is administered by trained research staff face-to-face at a time and location convenient to them, and participants receive \$AUD40 reimbursement.

The core quantitative interview monitors patterns of drug use and includes questions on price, purity and availability of the main drug types, including pharmaceutical opioids<sup>24</sup>. Data will be used from the 2017 interview (conducted May-June 2017), which included additional items around tapentadol SRF use. These items pertained to:

- Levels of tapentadol extra-medical use: diverted Palexia® SR, swallowed, injected, smoked, snorted (past six month use and number of days)
- Other opioid use (pharmaceuticals and heroin): swallowed, injected, smoked, snorted (past six month use and number of days)
- Street (diverted) price and perceived availability of diverted tapentadol and other opioids
- Attractiveness of tapentadol for use via injection
- Overdose (each opioid).

### **Data analysis**

#### *Population-level data*

Opioid utilisation (IMS Health) and intentional pharmaceutical opioid exposure poisonings (PIC) data will be presented graphically over time by opioid type, opioid formulation and, where available tablet strength (nationally and by jurisdiction). Opioid utilisation data will be presented as number of packs and number of oral morphine equivalent (OME) grams; the latter will be computed using published conversion guidelines<sup>25</sup>. Percentage of total OME/packs will be calculated for tapentadol and other opioid formulations to graph the underlying rate of sales. Trends over time in tapentadol sales will be assessed using negative binomial or poisson generalised estimating equations (to take into account non-independence), including variables to account for time/seasonality.

PIC data will be presented as rates of intentional pharmaceutical opioid exposure poisonings using IMS sales data as the denominator; specifically, rates per 100,000 OME grams and per 1,000 packs distributed per month. Trends over time in tapentadol exposures will also be modelled using generalised estimating equations.

Various comparators will be used for these analyses, including specific pharmaceutical opioid formulations (e.g., tramadol, oxycodone), and opioids grouped as per WHO guidelines<sup>26</sup> into *strong prescription opioids* (buprenorphine, fentanyl, hydromorphone, methadone, morphine and oxycodone; all listed as 'Schedule 8' opioids in Australian classification of medicines and poisons), *other prescription opioids* (prescribed codeine, dextropropoxyphene, and tramadol; 'Schedule 4' in Australia) and *over-the-counter opioids* (codeine products available at pharmacies without a prescription).

#### *Sentinel data*

Cryptomarket and IDRS data will be described using descriptive statistics, with the former graphed as number of vendors for SRF tapentadol and other pharmaceutical opioid formulations by month. Parametric and non-parametric tests of significance, as well as measures of effect size, will be used to describe differences in rates of extra-medical use, diversion, attractiveness, and overdose for tapentadol versus other opioid formulations.

### **ETHICS AND DISSEMINATION**

The authors confirm ethics approval is not required for pharmaceutical sales data. The IDRS has received ethical approval from the University of New South Wales Human Research Ethics Committee (HC12086), as well as from the relevant ethics committees in each jurisdiction. Participants provided informed consent prior to completing the interview. The Sydney Children's Hospitals Network Human Research Ethics Committee has approved the use of data collected by the PIC (*Retrospective review of incidence and toxicity of various exposures from calls to Australian Poisons Information Centres; LNR/16/SCHN/44*).

We plan to publish our findings mid-2018 in a peer-reviewed journal article as per the data sources and outcomes listed in Table 1 and research questions specified in the aims above, and these findings will also be presented at conferences. Publications will comply with STROBE guidelines<sup>27</sup>. Restrictions will apply to the availability of these data as they are used with approval from data

1  
2  
3 custodians for the purposes of this study, but they may be available following approval from the  
4 researchers, custodians of the data, and any other involved third party.  
5  
6

## 7 8 **DISCUSSION**

9 This post-marketing study forms part of a growing body of literature detailing comprehensive and  
10 transparent monitoring of specific pharmaceutical opioid formulations in regards to key indicators of  
11 use, extra-medical use, and harms<sup>28</sup>. Concern is growing regarding rates of pharmaceutical opioid  
12 extra-medical use and harms. Consequently, it is important to determine how shifts in the  
13 pharmaceutical opioid market, including availability of new formulations, plays out in terms of these  
14 outcomes. There has been no such undertaking for tapentadol globally, despite availability in the US  
15 for nearly a decade, and indications of a small but growing pharmaceutical opioid market share<sup>17</sup>,  
16 making the current study critical.  
17  
18  
19  
20  
21  
22

23 It should be noted that this study is limited in terms of the number of available data sources relative  
24 to other post-marketing studies<sup>28</sup>. However, this is a systems-level issue, as tapentadol is not  
25 differentiated from other pharmaceutical opioids in most healthcare and law enforcement data  
26 coding systems. There are a number of limitations to the chosen data sources as well, primarily: that  
27 IMS Health sales data does not index the number of individuals prescribed opioids, nor does PIC data  
28 index all individuals with an adverse event, captured in other healthcare sources. However, IMS data  
29 is estimated to cover over 94% of all sales nationally<sup>29</sup>, making it strong index of pharmaceutical  
30 opioid exposure in the community. Similarly, PIC data has complete coverage nationally and  
31 captures details related to type of exposure and dose critical to understanding risk of adverse  
32 exposure. We would also argue that online drug marketplace data and IDRS are necessary and key  
33 sentinel data sources, being established to identify emerging trends in drug use. IDRS participants  
34 typically report injecting heroin, methamphetamine and/or pharmaceutical opioids<sup>24</sup>, making valid  
35 comparison across these substances and across jurisdictions with varying levels of heroin and  
36 pharmaceutical opioid availability.  
37  
38  
39  
40  
41  
42  
43  
44  
45  
46

47 In light of these strengths, we think that triangulation of these sources will provide a clear picture of  
48 tapentadol use, extra-medical use, attractiveness and associated harms. We believe these findings  
49 will be critical to understanding possible risks in terms of extra-medical use and harms if tapentadol  
50 prescribing increases. More broadly though, these findings will help to enhance understanding as to  
51 the impact changes in the pharmaceutical opioid market can have on extra-medical use and harms  
52 from a policy, industry, clinician and research perspective.  
53  
54  
55  
56  
57  
58  
59  
60

**ACKNOWLEDGEMENTS**

Thank you to Jared Brown of the NSW Poison Information Centre for his advice on the study protocol.

**COMPETING INTERESTS**

Some of the investigators have received investigator-initiated untied educational grants from Reckitt Benckiser/Indivior for studies of buprenorphine-naloxone (BL, LD), buprenorphine depot (BL, LD, MF), naloxone (LD, MF), the development of an opioid-related behavior scale (BL, LD), the pharmacogenetic predictors of treatment success (RA), and a study of opioid substitution therapy uptake among chronic non-cancer pain patients (BL, LD). Some of the investigators have also received investigator-initiated untied educational grants from Mundipharma for post-marketing surveillance of a tamper-resistant opioid formulation (AP, BL, LD, MF).

**FUNDING STATEMENT**

This work was supported by investigator-initiated untied educational grant funding from Seqirus Pty Ltd (the marketer of tapentadol SRF in Australia), granted to AP, BL, MF, RC, and LD. The funder had no role in the design, conduct or interpretation of the study's findings. BL, AP and LD are supported by NHMRC research fellowships (#1073858, #1109366 and #1041472). The National Drug and Alcohol Research Centre at UNSW Australia is supported by funding from the Australian Government under the Substance Misuse Prevention and Service Improvements Grant Fund.

**AUTHORS' CONTRIBUTIONS**

LD, AP, BL, MF, NB, and RC contributed to the development of the study for the purposes of the funding proposal and development of the study design. LD, AP, and BL led writing of the first draft. All authors contributed to the critical review of the manuscript. All authors read and approved the final manuscript.

## REFERENCES

1. Karanges EA, Blanch B, Buckley NA, et al. Twenty-five years of prescription opioid use in Australia: a whole-of-population analysis using pharmaceutical claims. *British journal of clinical pharmacology* 2016
2. Blanch B, Pearson SA, Haber PS. An overview of the patterns of prescription opioid use, costs and related harms in Australia. *British journal of clinical pharmacology* 2014;78(5):1159-66.
3. Larance B, Degenhardt L, Lintzeris N, et al. Definitions related to the use of pharmaceutical opioids: Extramedical use, diversion, non-adherence and aberrant medication-related behaviours. *Drug and alcohol review* 2011;30(3):236-45.
4. Compton WM, Volkow ND. Major increases in opioid analgesic abuse in the United States: concerns and strategies. *Drug and alcohol dependence* 2006;81(2):103-07.
5. Compton WM, Volkow ND. Abuse of prescription drugs and the risk of addiction. *Drug and alcohol dependence* 2006;83:S4-S7.
6. Drewes AM, Jensen RD, Nielsen LM, et al. Differences between opioids: pharmacological, experimental, clinical and economical perspectives. *British journal of clinical pharmacology* 2013;75(1):60-78.
7. US Food and Drug Administration. FDA Opioids Action Plan 2016 [Available from: <http://www.fda.gov/NewsEvents/Newsroom/FactSheets/ucm484714.htm>].
8. Manchikanti L, Abdi S, Atluri S, et al. American Society of Interventional Pain Physicians (ASIPP) guidelines for responsible opioid prescribing in chronic non-cancer pain: Part 2--guidance. *Pain physician* 2012;15(3 Suppl):S67-116.
9. Kress HG. Tapentadol and its two mechanisms of action: Is there a new pharmacological class of centrally-acting analgesics on the horizon? *European journal of pain* 2010;14(8):781-83.
10. Riemsma R, Forbes C, Harker J, et al. Systematic review of tapentadol in chronic severe pain. *Current medical research and opinion* 2011;27(10):1907-30.
11. World Health Organisation. Tapentadol: Critical review report. 2014
12. Vorsanger G, Xiang J, Okamoto A, et al. Evaluation of study discontinuations with tapentadol immediate release and oxycodone immediate release in patients with low back or osteoarthritis pain. *Journal of opioid management* 2009;6(3):169-79.
13. Vadivelu N, Timchenko A, Huang Y, et al. Tapentadol extended-release for treatment of chronic pain: a review. *Journal of pain research* 2011;4:211.
14. Butler SF, McNaughton EC, Black RA. Tapentadol abuse potential: a postmarketing evaluation using a sample of individuals evaluated for substance abuse treatment. *Pain Medicine* 2015;16(1):119-30.
15. Cepeda MS, Fife D, Kihm MA, et al. Comparison of the risks of shopping behavior and opioid abuse between tapentadol and oxycodone and association of shopping behavior and opioid abuse. *The Clinical journal of pain* 2014;30(12):1051-56.

16. McNaughton EC, Black RA, Weber SE, et al. Assessing abuse potential of new analgesic medications following market release: an evaluation of Internet discussion of tapentadol abuse. *Pain Medicine* 2015;16(1):131-40.
17. Cepeda MS, Fife D, Ma Q, et al. Comparison of the risks of opioid abuse or dependence between tapentadol and oxycodone: results from a cohort study. *The Journal of Pain* 2013;14(10):1227-41.
18. Dart RC, Cicero T, Surratt H, et al. Assessment of the abuse of tapentadol immediate release: the first 24 months. *Journal of opioid management* 2012;8(6):395-402.
19. Perglozzi JV, Schug SA, Raffa RB, et al. Tapentadol and dual pain inhibition: A new strategy for pain relief in Australia. 2 2015;1
20. Pharmaceutical Benefits Scheme. Tapentadol, tablet, 50mg, 100mg, 150mg, 200mg and 250mg (as hydrochloride) (sustained release), Palexia SR® - November 2013 2013 [Available from: <http://www.pbs.gov.au/info/industry/listing/elements/pbac-meetings/psd/2013-11/tapentadol>].
21. Cairns R, Brown J, Buckley N. The impact of codeine re-scheduling on misuse: a retrospective review of calls to Australia's largest poisons centre. *Addiction* 2016
22. Burns L, Roxburgh A, Bruno R, et al. Monitoring drug markets in the Internet age and the evolution of drug monitoring systems in Australia. *Drug testing and analysis* 2014;6(7-8):840-45.
23. Roxburgh A, Van Buskirk J, Burns L, et al. Drugs and the Internet. Issue 8, May 2017. Sydney: National Drug and Alcohol Research Centre, 2017.
24. Stafford J, Breen C. Australian Drug Trends 2016: Findings from the Illicit Drug Reporting System (IDRS). Sydney: National Drug and Alcohol Research Centre, 2017.
25. Nielsen S, Degenhardt L, Hoban B, et al. Comparing opioids: A guide to estimating oral morphine equivalents (OME) in research. Sydney: National Drug and Alcohol Research Centre, 2014.
26. Zech DF, Grond S, Lynch J, et al. Validation of World Health Organization Guidelines for cancer pain relief: a 10-year prospective study. *Pain* 1995;63(1):65-76.
27. Vandembroucke JP, Von Elm E, Altman DG, et al. Strengthening the Reporting of Observational Studies in Epidemiology (STROBE): explanation and elaboration. *PLoS medicine* 2007;4(10):e297.
28. Larance B, Dobbins T, Peacock A, et al. The impacts of a potentially tamper-resistant oxycodone formulation on opioid use and harms: Main findings from the National Opioid Medication Abuse Deterrence (NOMAD) study. under review
29. IMS Health. Australian Pharmaceutical Index: IMS Plus workshop manual. Sydney: IMS Health Australia, 2009.
30. Australian Government Department of Health. The Pharmaceutical Benefits Scheme: Morphine Item Number 2017 [Available from: <https://www.pbs.gov.au/medicine/item/10858L-10862Q-10863R-10864T-10868B-10869C-10874H-10878M-1607N-1644M-1645N-1646P-1647Q-1653B-1654C-1655D-1656E-2122Q-2123R-2124T-2839K-2840L-2841M-3479D>]

1  
2  
3 [3480E-4349X-5163R-5168B-5169C-5170D-5237P-5238Q-5239R-5391R-5393W-5394X-](#)  
4 [8035X-8146R-8305D-8306E-8349K-8453X-8454Y-8489T-8490W-8491X-8492Y-8493B-8494C-](#)  
5 [8669G-8670H](#) accessed 29 July 2017.  
6  
7  
8  
9  
10  
11  
12  
13  
14  
15  
16  
17  
18  
19  
20  
21  
22  
23  
24  
25  
26  
27  
28  
29  
30  
31  
32  
33  
34  
35  
36  
37  
38  
39  
40  
41  
42  
43  
44  
45  
46  
47  
48  
49  
50  
51  
52  
53  
54  
55  
56  
57  
58  
59  
60

For peer review only



1  
2  
3  
4  
5  
6  
7  
8  
9  
10  
11  
12  
13  
14  
15  
16  
17  
18  
19  
20  
21  
22  
23  
24  
25  
26  
27  
28  
29  
30  
31  
32  
33  
34  
35  
36  
37  
38  
39  
40  
41  
42  
43  
44  
45  
46  
47

**Table 1: Summary of the primary outcomes from each data source**

| Research outcome                                                     | Pharmaceutical opioid sales data | Interviews with people who inject drugs | Online drug marketplace data | Poisons Information Centre calls |
|----------------------------------------------------------------------|----------------------------------|-----------------------------------------|------------------------------|----------------------------------|
| <b>Research Question 1: Exposure</b>                                 |                                  |                                         |                              |                                  |
| Population level availability                                        |                                  |                                         |                              |                                  |
| <b>Research Question 2: Extra-Medical Use</b>                        |                                  |                                         |                              |                                  |
| Levels of extra-medical use (diverted)                               |                                  |                                         |                              |                                  |
| Injection                                                            |                                  |                                         |                              |                                  |
| Snorting                                                             |                                  |                                         |                              |                                  |
| Chewing                                                              |                                  |                                         |                              |                                  |
| Perceived availability (diverted)                                    |                                  |                                         |                              |                                  |
| <b>Research Question 3: Attractiveness</b>                           |                                  |                                         |                              |                                  |
| Attractiveness for extra-medical use (market value)                  |                                  |                                         |                              |                                  |
| <b>Research Question 4: Harms</b>                                    |                                  |                                         |                              |                                  |
| Overdose - non-fatal                                                 |                                  |                                         |                              |                                  |
| Intentional exposure (intentional self-poisoning, misuse, and abuse) |                                  |                                         |                              |                                  |

For peer review only

## Appendix 1. Data Sources Reviewed for Inclusion

| Source                                                      | Sample             | Geographic Coverage <sup>1</sup>    | Distinguishes opioid type <sup>2</sup> | Distinguishes opioid brand      | Comments                                                                                                                                                                                                                                                                                                                                                                                                                                                                                                                                                       |
|-------------------------------------------------------------|--------------------|-------------------------------------|----------------------------------------|---------------------------------|----------------------------------------------------------------------------------------------------------------------------------------------------------------------------------------------------------------------------------------------------------------------------------------------------------------------------------------------------------------------------------------------------------------------------------------------------------------------------------------------------------------------------------------------------------------|
| <i>Annual/Repeated Data Collections</i>                     |                    |                                     |                                        |                                 |                                                                                                                                                                                                                                                                                                                                                                                                                                                                                                                                                                |
| National Drug Strategy Household Survey (NDSHS)             | Population         | National and all states/territories | Yes                                    | No                              |                                                                                                                                                                                                                                                                                                                                                                                                                                                                                                                                                                |
| National Survey of Mental Health and Wellbeing (NSMHWB)     | Population         | National and all states/territories | No                                     | No                              |                                                                                                                                                                                                                                                                                                                                                                                                                                                                                                                                                                |
| Wastewater data                                             | Population         | National and all states/territories | Yes                                    | No                              |                                                                                                                                                                                                                                                                                                                                                                                                                                                                                                                                                                |
| Ecstasy and Related Drug Reporting System (EDRS) interviews | High-risk sentinel | National and all states/territories | Yes                                    | No                              |                                                                                                                                                                                                                                                                                                                                                                                                                                                                                                                                                                |
| Illicit Drug Reporting System (IDRS) interviews             | High-risk sentinel | National and all states/territories | Yes                                    | Yes                             | Gives opioid type, strength and brand, and includes OTC codeine. Data available from 2017 only                                                                                                                                                                                                                                                                                                                                                                                                                                                                 |
| Drug Use Monitoring in Australia (DUMA)                     | High-risk sentinel | NSW, QLD, SA, WA                    | Yes                                    | No                              |                                                                                                                                                                                                                                                                                                                                                                                                                                                                                                                                                                |
| Australian NSP survey                                       | High-risk sentinel | National and all states/territories | Yes                                    | No                              |                                                                                                                                                                                                                                                                                                                                                                                                                                                                                                                                                                |
| Women and Sexual Health Survey (SWASH)                      | High-risk sentinel | NSW and WA                          | No                                     | No                              |                                                                                                                                                                                                                                                                                                                                                                                                                                                                                                                                                                |
| Gay Community Periodic Survey                               | High-risk sentinel | SA, ACT, VIC, WA, QLD, NSW, TAS     | No                                     | No                              |                                                                                                                                                                                                                                                                                                                                                                                                                                                                                                                                                                |
| <i>Sales and Dispensing Data Collections</i>                |                    |                                     |                                        |                                 |                                                                                                                                                                                                                                                                                                                                                                                                                                                                                                                                                                |
| Prescription sales data                                     | Population         | National and all states/territories | Yes                                    | Yes                             | Gives opioid type, strength and brand, and includes OTC codeine                                                                                                                                                                                                                                                                                                                                                                                                                                                                                                |
| Pharmaceutical Benefits Scheme                              | Population         | National and all states/territories | Yes                                    | Depends on the opioid type/dose | Item codes for pharmaceutical opioids (the unit by which data can be extracted) do not differentiate by brand where multiple brands offer products of the same strength (e.g., four different brands of morphine products fall under item code '1653B: morphine sulfate 10mg modified release tablet') <sup>30</sup> . Further, only medicines contained in the Schedule of Pharmaceutical Benefits appear in these statistics (excluding over-the-counter codeine), and SRF tapentadol was only listed on the Schedule two years post-introduction (in 2013). |
| Medicare Benefits Scheme                                    | Population         | National and all states/territories | No                                     | No                              |                                                                                                                                                                                                                                                                                                                                                                                                                                                                                                                                                                |
| <i>Administrative Data Collections</i>                      |                    |                                     |                                        |                                 |                                                                                                                                                                                                                                                                                                                                                                                                                                                                                                                                                                |
| Poison Information Centre call data                         | Population         | All states/territories              | Yes                                    | Yes                             | Gives opioid type, strength and brand where these characteristics can be identified by the caller, and includes OTC codeine                                                                                                                                                                                                                                                                                                                                                                                                                                    |
| Ambulance data collections                                  | Population         | All states/territories              | No                                     | No                              |                                                                                                                                                                                                                                                                                                                                                                                                                                                                                                                                                                |
| Emergency department data collections                       | Population         | All states/territories              | Depends on the coding system           | No                              |                                                                                                                                                                                                                                                                                                                                                                                                                                                                                                                                                                |
| Admitted patient data collections                           | Population         | National and all states/territories | No                                     | No                              |                                                                                                                                                                                                                                                                                                                                                                                                                                                                                                                                                                |
| Mortality data                                              | Population         | National and all states/territories | No                                     | No                              |                                                                                                                                                                                                                                                                                                                                                                                                                                                                                                                                                                |
| Mental health ambulatory data collections                   | Population         | NSW, VIC, TAS, WA                   | No                                     | No                              |                                                                                                                                                                                                                                                                                                                                                                                                                                                                                                                                                                |
| Alcohol and drug treatment helpline calls                   | Population         | All states/territories              | Depends on the coding system           | No                              |                                                                                                                                                                                                                                                                                                                                                                                                                                                                                                                                                                |
| Needle-syringe programme data                               | High-risk sentinel | National and all states/territories | Depends on the coding system           | No                              |                                                                                                                                                                                                                                                                                                                                                                                                                                                                                                                                                                |
| Medically-supervised injecting clinic data                  | High-risk sentinel | NSW                                 | Depends on the coding system           | No                              |                                                                                                                                                                                                                                                                                                                                                                                                                                                                                                                                                                |
| Prescription monitoring programme data                      | High-risk sentinel | TAS                                 | Yes                                    | Yes                             | Incomplete coverage with continued implementation of the programme, with voluntary opt in by pharmacists and general practitioners, and no requirement for use for every                                                                                                                                                                                                                                                                                                                                                                                       |

1  
2  
3  
4  
5  
6  
7  
8  
9  
10  
11  
12  
13  
14  
15  
16  
17  
18  
19  
20  
21  
22  
23  
24  
25  
26  
27  
28  
29  
30  
31  
32  
33  
34  
35  
36  
37  
38  
39  
40  
41  
42  
43  
44  
45  
46  
47

|                                          |                    |                                     |     |     |  |                                                                                                     |
|------------------------------------------|--------------------|-------------------------------------|-----|-----|--|-----------------------------------------------------------------------------------------------------|
|                                          |                    |                                     |     |     |  | dispensing episode.                                                                                 |
| Pharmacotherapy program data             | Population         | National and all states/territories | Yes | No  |  |                                                                                                     |
| Alcohol and drug treatment services data | Population         | National and all states/territories | Yes | No  |  |                                                                                                     |
| Arrest data                              | Population         | National and all states/territories | Yes | No  |  |                                                                                                     |
| Seizure data                             | Population         | National and all states/territories | Yes | No  |  |                                                                                                     |
| Street price data                        | Population         | National and all states/territories | Yes | No  |  |                                                                                                     |
| Criminal court data                      | Population         | National and all states/territories | Yes | No  |  |                                                                                                     |
| <i>Online Monitoring</i>                 |                    |                                     |     |     |  |                                                                                                     |
| Online marketplace monitoring            | High-risk sentinel | National                            | Yes | Yes |  | Gives opioid brand/dose for sale on online marketplaces.<br>Data is only available from early 2013. |

**Note.** <sup>1</sup> National: collated and reported at national level only; National and all states/territories: collated and reported at national and state/territory-level; All states/territories: collated and reported at the state/territory level only. <sup>2</sup> Distinguishes between types of opioids (e.g., morphine and oxycodone). NSW: New South Wales; QLD: Queensland; SA: South Australia; WA: Western Australia; TAS: Tasmania; Australian Capital Territory; VIC: Victoria.

For peer review only

# BMJ Open

## Opioid Use and Harms Associated with a Sustained-Released Tapentadol Formulation: A Post-Marketing Study Protocol

|                                 |                                                                                                                                                                                                                                                                                                                                                                                                                                                                                                                |
|---------------------------------|----------------------------------------------------------------------------------------------------------------------------------------------------------------------------------------------------------------------------------------------------------------------------------------------------------------------------------------------------------------------------------------------------------------------------------------------------------------------------------------------------------------|
| Journal:                        | <i>BMJ Open</i>                                                                                                                                                                                                                                                                                                                                                                                                                                                                                                |
| Manuscript ID                   | bmjopen-2017-020006.R1                                                                                                                                                                                                                                                                                                                                                                                                                                                                                         |
| Article Type:                   | Protocol                                                                                                                                                                                                                                                                                                                                                                                                                                                                                                       |
| Date Submitted by the Author:   | 17-Jan-2018                                                                                                                                                                                                                                                                                                                                                                                                                                                                                                    |
| Complete List of Authors:       | Peacock, Amy; National Drug and Alcohol Research Centre; School of Medicine<br>Larance, Briony; University of New South Wales, National Drug and Alcohol Research Centre<br>Farrell, Michael; University of New South Wales, National Drug and Alcohol Research Centre<br>Cairns, Rose; University of Sydney, School of Medical Sciences<br>Buckley, Nicholas; University of Sydney, School of Medical Sciences<br>Degenhardt, Louisa; University of New SouthWales, National Drug and Alcohol Research Centre |
| <b>Primary Subject Heading</b>: | Addiction                                                                                                                                                                                                                                                                                                                                                                                                                                                                                                      |
| Secondary Subject Heading:      | Addiction, Epidemiology, Public health                                                                                                                                                                                                                                                                                                                                                                                                                                                                         |
| Keywords:                       | tapentadol, pharmaceutical opioid, tamper, Substance misuse < PSYCHIATRY, harm, Overdose                                                                                                                                                                                                                                                                                                                                                                                                                       |
|                                 |                                                                                                                                                                                                                                                                                                                                                                                                                                                                                                                |

SCHOLARONE™  
Manuscripts

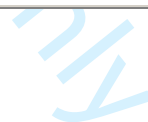

1  
2  
3  
4  
5  
6  
7  
8  
9

## Opioid Use and Harms Associated with a Sustained-Released Tapentadol Formulation: A Post-Marketing Study Protocol

10 Amy Peacock<sup>1,2</sup>, Briony Larance<sup>1</sup>, Michael Farrell<sup>1</sup>, Rose Cairns<sup>3,4</sup>, Nicholas Buckley<sup>3,4</sup>, & Louisa  
11 Degenhardt<sup>1,5,6,7</sup>  
12

- 13  
14 1. National Drug and Alcohol Research Centre, University of New South Wales, NSW, Australia  
15 2. School of Medicine, University of Tasmania, TAS, Australia  
16 3. NSW Poisons Information Centre, The Children's Hospital at Westmead, NSW, Australia  
17 4. School of Medical Sciences, University of Sydney, Sydney, NSW  
18 5. School of Population and Global Health, University of Melbourne, VIC, Australia  
19 6. Murdoch Children's Research Institute, Australia  
20 7. Department of Global Health, School of Public Health, University of Washington, USA  
21  
22  
23  
24  
25  
26  
27  
28  
29  
30  
31  
32

33 **Word Count:** 2,636  
34

35 **Corresponding author:** Amy Peacock, Research Fellow, National Drug and Alcohol Research Centre,  
36 University of New South Wales, e: [amy.peacock@unsw.edu.au](mailto:amy.peacock@unsw.edu.au), t: +61 2 9385 0333, f: +61 2 9385  
37 0222.  
38  
39  
40  
41  
42  
43  
44  
45  
46  
47  
48  
49  
50  
51  
52  
53  
54  
55  
56  
57  
58  
59  
60

## ABSTRACT

**Introduction:** It has been argued that pharmacologically tapentadol may have lower abuse potential than other pharmaceutical opioids currently available. However, there has been no comprehensive triangulation of data regarding use and harms associated with this formulation. A sustained-release formulation (SRF) of tapentadol (Palexia®) was released in Australia in 2011 and listed for public subsidy in 2013. We summarise here the methods of a post-marketing study which will measure post-introduction: i) population level availability, ii) extra-medical use and diversion, iii) attractiveness for extra-medical use, and iv) associated harms, of tapentadol compared against other pharmaceutical opioids.

**Methods and Analysis:** We evaluated key sources on pharmaceutical use and harms in Australia, and were limited to triangulating data from four sources that disaggregate pharmaceutical opioid formulations and captured the tapentadol SRF. These data sources comprised: i) national pharmaceutical opioid community sales data from 2011-2017, ii) national pharmaceutical opioid poisonings reported to Poison Information Centres from 2011-2017, iii) number of vendors on online marketplaces listing pharmaceutical opioids for sale, and iv) data on pharmaceutical opioid extra-medical use, attractiveness, and harms from interviews with people who inject drugs in Australia.

**Ethics and Dissemination:** Ethics approval is not required for use of pharmaceutical sales data. Ethics approval has been obtained for use of national pharmaceutical opioid poisonings reported to Poison Information Centres (LNR/16/SCHN/44) and for use of online marketplace data and interview data from people who inject drugs (HC12086). Key findings will be published mid-2018 in a peer-reviewed academic journal, and presented at various conferences and professional meetings.

**Keywords:** opioid; tapentadol; overdose; tamper; substance misuse; harm

### STRENGTHS AND LIMITATIONS

- This study will comprise the first published comprehensive assessment of tapentadol SRF use, extra-medical use, attractiveness for extra-medical use, and associated harms.
- The number of data sources is limited relative to other post-marketing studies of pharmaceutical opioids as tapentadol is rarely coded separate to other pharmaceutical opioids in administrative data.
- However, this study will overview a wealth of data from the general population and a group at high risk for extra-medical use, both of which are key to examine when quantifying various impacts of pharmaceutical opioids.
- These findings will have relevance to other countries where tapentadol has recently been introduced or where it may be introduced in the future.

## INTRODUCTION

In the past two decades, there has been an increase in the number of pharmaceutical opioids available, and in the prescribing of these drugs, in several high-income countries, including North America and Australia<sup>1</sup>. Indeed, between 1992-2012 the number of pharmaceutical opioid dispensing episodes increased fifteen-fold in Australia<sup>2</sup>. This increase in availability in Australia has been accompanied by greater rates of extra-medical use, defined as use outside the bounds of a doctor's prescription<sup>3</sup>. The risk of opioid dependence and serious adverse events (e.g., overdose) associated with extra-medical use has made addressing this problem a public health imperative<sup>4,5</sup>.

Opioids differ in the extent to which they are likely to be associated with hazardous patterns of use due to different potencies (i.e., weak to strong opioids), pharmacokinetic characteristics (e.g., rate of metabolism) and propensities for dependence<sup>6</sup>. The need to reduce extra-medical use must also be balanced against the need for access to opioid therapy for pain. Thus, current public health agency strategies to reduce extra-medical pharmaceutical opioid use and chronic pain prescribing guidelines focus on products which have limited or no abuse potential<sup>7,8</sup>.

Tapentadol is a centrally acting opioid analgesic with dual mechanisms of action, specifically  $\mu$ -opioid receptor agonist and noradrenaline reuptake inhibition. This dual action is thought to result in a lower dose required to produce a given level of analgesia<sup>9</sup>. Clinical trials suggest that tapentadol provides equivalent or superior levels of pain relief for acute and chronic pain similar to oxycodone and morphine, with greater gastro-intestinal tolerability in terms of reduced rates of nausea, vomiting, and constipation<sup>10-13</sup>.

A recent review by the World Health Organization's Expert Committee on Drug Dependence<sup>11</sup> concluded that potential for abuse for tapentadol may be similar to or slightly lower than other opioids such as hydromorphone, oxycodone, morphine and tramadol. However, they note that these conclusions are tentative given a lack of data regarding tapentadol "abuse, dependence, diversion, recreational use, or poison control", noting that tapentadol generally does not feature in drug use surveys or surveillance reports. The few studies which have been conducted are based on US samples, and using treatment-seeking populations<sup>14</sup> or evaluation of internet discussions<sup>15,16</sup> and prescribing data<sup>17</sup> to assess extra-medical use, with early indications of rates of abuse and diversion equivalent to hydromorphone and lower than oxycodone and most other strong opioids<sup>14,18</sup>.



1  
2  
3 The immediate release form of tapentadol is registered in Australia for moderate to severe pain,  
4 while the sustained release form is registered for severe pain which requires constant opioid  
5 treatment and for which no other opioid other treatments are adequate<sup>19</sup>. Although a sustained-  
6 release formulation of tapentadol (SRF; Palexia® SR) was released in Australia in 2011, and listed for  
7 subsidy on the Pharmaceutical Benefits Scheme in November 2013<sup>20</sup>, no research into rates into  
8 dispensing, extra-medical use, and associated harms of the tapentadol SRF has been undertaken in  
9 Australia. Given the broader context of rising rates of pharmaceutical opioid use and harms  
10 (including overdose), monitoring new formulations in terms of population level pharmaceutical  
11 opioid use, and extra-medical use amongst high risk populations (e.g., those reporting extra-medical  
12 use of other pharmaceutical use) is critical.

13  
14  
15  
16  
17  
18  
19  
20 This paper outlines the design for a national post-marketing study of use, extra-medical use, and  
21 harms associated with introduction of the tapentadol SRF in Australia. This study will integrate  
22 population and sentinel high-risk population data, including national pharmaceutical opioid sales  
23 data, interviews with people who inject drugs, and national opioid-related poisoning event data.

## 24 25 26 27 28 29 30 **METHODS AND ANALYSIS**

### 31 **Study aims**

32 The overarching aim of this study is to identify extra-medical use and diversion of tapentadol SRF,  
33 attractiveness for extra-medical use, and associated levels of harms compared to these indicators for  
34 other pharmaceutical opioid use. The specific questions we aim to answer are as follows:

- 35 1. What is the population level availability of the tapentadol SRF in Australia relative to other  
36 pharmaceutical opioids?
- 37 2. Are there indications of extra-medical use of the tapentadol SRF (specifically, non-prescribed  
38 use, use via routes that require tampering), and how does this compare to other  
39 pharmaceutical opioids?
- 40 3. What is the relative attractiveness for extra-medical use (e.g., street price) of the tapentadol  
41 SRF, and how does this compare to other pharmaceutical opioids?
- 42 4. Are there indications of associated harm with the tapentadol SRF (specifically, self-reported  
43 non-fatal overdose, as well as intentional poisoning, extra-medical use and abuse as  
44 identified through poison information centre data), and how does this compare to other  
45 pharmaceutical opioids?
- 46  
47  
48  
49  
50  
51  
52  
53  
54  
55  
56  
57  
58  
59  
60

### Study design and setting

This study is being conducted in Australia. There are three main components of this study: analyses of existing routine data sources (2011-2017); analyses of data from monitoring online drug marketplaces (2013-2017); and analyses of cross-sectional data collected from a high-risk sentinel group (people who inject drugs) participating in the Illicit Drug Reporting System (IDRS) in 2016.

Most indicator data sets in Australia do not routinely separate tapentadol from other pharmaceutical opioids, precluding any comparison of population-level availability (see Appendix 1). Five data sources were identified which could provide data specific to pharmaceutical opioid brand, thus allowing analysis of use and harms related to tapentadol SRF. Prescription monitoring programme data, although theoretically useful, only exist in one jurisdiction, where registration is voluntary and implementation is not complete or consistent, and utilisation of this programme irregular. Consequently, four data sources were included in this study: pharmaceutical opioid sales data; poison information centre call data; online drug marketplace data; and interviews with people who inject drugs. **Table 1** outlines the relevant outcome for each data source for each research question.

**\*\*Table 1 approximately here\*\***

#### *Pharmaceutical opioid sales data*

A third-party access request to obtain pharmaceutical sales data in Australia was approved by IMS Health. These data include all pharmaceutical opioid purchases through pharmaceutical wholesalers and manufacturers who sold direct to pharmacies between 2011 and 2017. Data reflects community sales only, excluding sales to hospitals. However, due to the legal requirements for secure storage of pharmaceuticals in pharmacies, and monitoring and recording of opioids depending on their schedule listing, the number of packs sold over a 12 month period closely approximates the number used.

All opioids available in Australia that are indicated for pain can be included and coded according to the World Health Organization's Anatomical Therapeutic Classification system code of A02A 'opioids' and A02B 'other analgesics and antipyretics'. This includes, but is not limited to, tapentadol (N02AX06), buprenorphine (N02AE01), prescription and over-the-counter codeine (N02BA51, N02BE51, N02AA59, R05DA04), dextropropoxyphene (N02AC04, N02AC54), fentanyl (N02AB03), hydromorphone (N02AA03), methadone (N02AC52), morphine (N02AA01), and oxycodone

1  
2  
3 (N02AA05, N02AA55). Injectable formulations are excluded, being mainly prescribed in hospitals,  
4 and formulations of methadone and buprenorphine used solely for the treatment of opioid  
5 dependence are excluded. However, over-the-counter codeine is captured in this data source. IMS  
6 Health data can be provided from January 2011 to December 2017 aggregated monthly broken  
7 down by opioid formulation, brand, strength, and geographic unit.  
8  
9  
10

#### 11 *Poison Information Centre call data*

12  
13 Four Poison Information Centres (PICs) in Australia, based in New South Wales, Queensland, Victoria  
14 and Western Australia, together provide nationwide, round-the-clock poisoning advice to healthcare  
15 professionals and members of the public. National data will be extracted regarding number of cases  
16 of pharmaceutical opioid exposure poisonings (including over-the-counter codeine) reported to PICs.  
17 Specifically, opioid-related calls will only be extracted where the exposure type/intent is coded as  
18 'recreational', so as to identify exposures where pharmaceutical opioids were taken for its  
19 intoxicating effects<sup>21</sup>. Where the intentional exposure subtype is not available or unclear, calls  
20 regarding opioids will undergo a free-text search for markers of extra-medical use and abuse  
21 (defined here as use of a drug in a way or for a purpose outside intended medical use, e.g., excess  
22 quantity, recreational use, use for non-approved purposes), then manually reviewed by PIC staff and  
23 recoded.  
24  
25  
26  
27  
28  
29  
30  
31

32  
33 Unit-level data collected between January 2011 and December 2017 will be extracted. Data fields to  
34 be extracted include call date, age group, gender, state/territory, dose, brand, active ingredients,  
35 and route of exposure.  
36  
37  
38

#### 39 *Online drug marketplace data*

40  
41 An existing surveillance system in Australia monitors availability and types of substances sold online  
42 via the darknet<sup>22 23</sup>. The darknet is accessible only via The Onion Router (TOR), software that enables  
43 anonymous communication. Cryptomarkets (markets operating on the darknet) have been accessed  
44 weekly since 2013 using a dedicated user account. Exhaustive snapshots of each accessible  
45 marketplace are taken, including details of vendor name, listing description and, where possible,  
46 country of origin. For this study, the number of vendors listing illicit pharmaceutical opioids for sale  
47 on cryptomarkets between January 2013 and December 2017 will be extracted by brand and by  
48 month. This data cannot provide any information about consumers who are buying drugs on the  
49 cryptomarkets, or any data on the total number of sales via these sites. However, it does yield timely  
50 and sensitive information regarding drug availability online.  
51  
52  
53  
54  
55  
56  
57  
58  
59  
60

### *Illicit Drug Reporting System data*

The Illicit Drug Reporting System (IDRS) is a national illicit drug monitoring system, one part of which comprises annual interviews with ~900 people who inject drugs interviewed in each capital city in Australia. Participants are recruited using multiple methods, including advertisements in street press, newspapers, treatment agencies, needle and syringe programs, and peer referral. To be eligible to participate, participants need to be at least 17 years of age; have injected at least monthly during the six months preceding interview; and have been a resident for at least 12 months in the capital city in which they are interviewed. The interview is administered by trained research staff face-to-face at a time and location convenient to them, and participants receive \$AUD40 reimbursement.

The core quantitative interview monitors patterns of drug use and includes questions on price, purity and availability of the main drug types, including pharmaceutical opioids<sup>24</sup>. Data will be used from the 2017 interview (conducted May-June 2017), which included additional items around tapentadol SRF use. These items pertained to:

- Levels of tapentadol extra-medical use: diverted Palexia® SR, swallowed, injected, smoked, snorted (past six month use and number of days)
- Other opioid use (pharmaceuticals and heroin): swallowed, injected, smoked, snorted (past six month use and number of days)
- Street (diverted) price and perceived availability of diverted tapentadol and other opioids
- Attractiveness of tapentadol for use via injection
- Overdose (each opioid).

### **Data analysis**

#### *Population-level data*

Opioid utilisation (IMS Health) and intentional pharmaceutical opioid exposure poisonings (PIC) data will be presented graphically over time by opioid type, opioid formulation and, where available tablet strength (nationally and by jurisdiction). Opioid utilisation data will be presented as number of packs and number of oral morphine equivalent (OME) grams; the latter will be computed using published conversion guidelines<sup>25</sup>. Percentage of total OME/packs will be calculated for tapentadol and other opioid formulations to graph the underlying rate of sales. Trends over time in tapentadol sales will be assessed using negative binomial or poisson generalised estimating equations (to take into account non-independence), including variables to account for time/seasonality.

PIC data will be presented as rates of intentional pharmaceutical opioid exposure poisonings using IMS sales data as the denominator; specifically, rates per 100,000 OME grams and per 1,000 packs distributed per month. Trends over time in tapentadol exposures will also be modelled using generalised estimating equations.

Various comparators will be used for these analyses, including specific pharmaceutical opioid formulations (e.g., tramadol, oxycodone), and opioids grouped as per WHO guidelines<sup>26</sup> into *strong prescription opioids* (buprenorphine, fentanyl, hydromorphone, methadone, morphine and oxycodone; all listed as 'Schedule 8' opioids in Australian classification of medicines and poisons), *other prescription opioids* (prescribed codeine, dextropropoxyphene, and tramadol; 'Schedule 4' in Australia) and *over-the-counter opioids* (codeine products available at pharmacies without a prescription).

#### *Sentinel data*

Cryptomarket and IDRS data will be described using descriptive statistics, with the former graphed as number of vendors for SRF tapentadol and other pharmaceutical opioid formulations by month. Parametric and non-parametric tests of significance, as well as measures of effect size, will be used to describe differences in rates of extra-medical use, diversion, attractiveness, and overdose for tapentadol versus other opioid formulations.

### **ETHICS AND DISSEMINATION**

The authors confirm ethics approval is not required for pharmaceutical sales data. The IDRS has received ethical approval from the University of New South Wales Human Research Ethics Committee (HC12086), as well as from the relevant ethics committees in each jurisdiction. Participants provided informed consent prior to completing the interview. The Sydney Children's Hospitals Network Human Research Ethics Committee has approved the use of data collected by the PIC (*Retrospective review of incidence and toxicity of various exposures from calls to Australian Poisons Information Centres; LNR/16/SCHN/44*).

We plan to publish our findings mid-2018 in a peer-reviewed journal article as per the data sources and outcomes listed in Table 1 and research questions specified in the aims above, and these findings will also be presented at conferences. Publications will comply with STROBE guidelines<sup>27</sup>. Restrictions will apply to the availability of these data as they are used with approval from data

1  
2  
3 custodians for the purposes of this study, but they may be available following approval from the  
4 researchers, custodians of the data, and any other involved third party.  
5  
6

## 7 8 **DISCUSSION**

9 This post-marketing study forms part of a growing body of literature detailing comprehensive and  
10 transparent monitoring of specific pharmaceutical opioid formulations in regards to key indicators of  
11 use, extra-medical use, and harms<sup>28</sup>. Concern is growing regarding rates of pharmaceutical opioid  
12 extra-medical use and harms. Consequently, it is important to determine how shifts in the  
13 pharmaceutical opioid market, including availability of new formulations, plays out in terms of these  
14 outcomes. There has been no such undertaking for tapentadol globally, despite availability in the US  
15 for nearly a decade, and indications of a small but growing pharmaceutical opioid market share<sup>17</sup>,  
16 making the current study critical.  
17  
18  
19  
20  
21  
22

23 It should be noted that this study is limited in terms of the number of available data sources relative  
24 to other post-marketing studies<sup>28</sup>. However, this is a systems-level issue, as tapentadol is not  
25 differentiated from other pharmaceutical opioids in most healthcare and law enforcement data  
26 coding systems. There are a number of limitations to the chosen data sources. IDRS reflects a  
27 sentinel population at high risk of extra-medical use, and thus will not reflect general population  
28 extra-medical use, nor will it cover all aspects of various outcomes (e.g., street price is only one  
29 aspect of pharmaceutical opioid attractiveness for extra-medial use). Further, IMS Health sales data  
30 does not index the number of individuals prescribed opioids, and PIC data does not index all  
31 individuals with an adverse event, captured in other healthcare sources. However, IMS data is  
32 estimated to cover over 94% of all sales nationally<sup>29</sup>, making it strong index of pharmaceutical  
33 opioid exposure in the community. Similarly, PIC data has complete coverage nationally and  
34 captures details related to type of exposure and dose critical to understanding risk of adverse  
35 exposure. We would also argue that online drug marketplace data and IDRS are necessary and key  
36 sentinel data sources, being established to identify emerging trends in drug use. IDRS participants  
37 typically report injecting heroin, methamphetamine and/or pharmaceutical opioids<sup>24</sup>, making valid  
38 comparison across these substances and across jurisdictions with varying levels of heroin and  
39 pharmaceutical opioid availability.  
40  
41  
42  
43  
44  
45  
46  
47  
48  
49  
50

51 In light of these strengths, we think that triangulation of these sources will provide a clear picture of  
52 tapentadol use, extra-medical use, attractiveness and associated harms. We believe these findings  
53 will be critical to understanding possible risks in terms of extra-medical use and harms if tapentadol  
54  
55  
56  
57  
58  
59

1  
2  
3  
4  
5  
6  
7  
8  
9  
10  
11  
12  
13  
14  
15  
16  
17  
18  
19  
20  
21  
22  
23  
24  
25  
26  
27  
28  
29  
30  
31  
32  
33  
34  
35  
36  
37  
38  
39  
40  
41  
42  
43  
44  
45  
46  
47  
48  
49  
50  
51  
52  
53  
54  
55  
56  
57  
58  
59  
60

prescribing increases. More broadly though, these findings will help to enhance understanding as to the impact changes in the pharmaceutical opioid market can have on extra-medical use and harms from a policy, industry, clinician and research perspective.

For peer review only

### ACKNOWLEDGEMENTS

Thank you to Jared Brown of the NSW Poison Information Centre for his advice on the study protocol.

### COMPETING INTERESTS

Some of the investigators have received investigator-initiated untied educational grants from Reckitt Benckiser/Indivior for studies of buprenorphine-naloxone (BL, LD), buprenorphine depot (BL, LD, MF), naloxone (LD, MF), the development of an opioid-related behavior scale (BL, LD), the pharmacogenetic predictors of treatment success (RA), and a study of opioid substitution therapy uptake among chronic non-cancer pain patients (BL, LD). Some of the investigators have also received investigator-initiated untied educational grants from Mundipharma for post-marketing surveillance of a tamper-resistant opioid formulation (AP, BL, LD, MF).

### FUNDING STATEMENT

This work was supported by investigator-initiated untied educational grant funding from Seqirus Pty Ltd (the marketer of tapentadol SRF in Australia), granted to AP, BL, MF, RC, and. The funder had no role in the design, conduct or interpretation of the study's findings. BL, AP and LD are supported by NHMRC research fellowships (#1073858, #1109366 and #1041472). The National Drug and Alcohol Research Centre at UNSW Australia is supported by funding from the Australian Government under the Substance Misuse Prevention and Service Improvements Grant Fund.

### AUTHORS' CONTRIBUTIONS

LD, AP, BL, MF, NB, and RC contributed to the development of the study for the purposes of the funding proposal and development of the study design. LD, AP, and BL led writing of the first draft. All authors contributed to the critical review of the manuscript. All authors read and approved the final manuscript.



## REFERENCES

1. Karanges EA, Blanch B, Buckley NA, et al. Twenty-five years of prescription opioid use in Australia: a whole-of-population analysis using pharmaceutical claims. *British journal of clinical pharmacology* 2016
2. Blanch B, Pearson SA, Haber PS. An overview of the patterns of prescription opioid use, costs and related harms in Australia. *British journal of clinical pharmacology* 2014;78(5):1159-66.
3. Larance B, Degenhardt L, Lintzeris N, et al. Definitions related to the use of pharmaceutical opioids: Extramedical use, diversion, non-adherence and aberrant medication-related behaviours. *Drug and alcohol review* 2011;30(3):236-45.
4. Compton WM, Volkow ND. Major increases in opioid analgesic abuse in the United States: concerns and strategies. *Drug and alcohol dependence* 2006;81(2):103-07.
5. Compton WM, Volkow ND. Abuse of prescription drugs and the risk of addiction. *Drug and alcohol dependence* 2006;83:S4-S7.
6. Drewes AM, Jensen RD, Nielsen LM, et al. Differences between opioids: pharmacological, experimental, clinical and economical perspectives. *British journal of clinical pharmacology* 2013;75(1):60-78.
7. US Food and Drug Administration. FDA Opioids Action Plan 2016 [Available from: <http://www.fda.gov/NewsEvents/Newsroom/FactSheets/ucm484714.htm>].
8. Manchikanti L, Abdi S, Atluri S, et al. American Society of Interventional Pain Physicians (ASIPP) guidelines for responsible opioid prescribing in chronic non-cancer pain: Part 2--guidance. *Pain physician* 2012;15(3 Suppl):S67-116.
9. Kress HG. Tapentadol and its two mechanisms of action: Is there a new pharmacological class of centrally-acting analgesics on the horizon? *European journal of pain* 2010;14(8):781-83.
10. Riemsma R, Forbes C, Harker J, et al. Systematic review of tapentadol in chronic severe pain. *Current medical research and opinion* 2011;27(10):1907-30.
11. World Health Organisation. Tapentadol: Critical review report. 2014
12. Vorsanger G, Xiang J, Okamoto A, et al. Evaluation of study discontinuations with tapentadol immediate release and oxycodone immediate release in patients with low back or osteoarthritis pain. *Journal of opioid management* 2009;6(3):169-79.
13. Vadivelu N, Timchenko A, Huang Y, et al. Tapentadol extended-release for treatment of chronic pain: a review. *Journal of pain research* 2011;4:211.
14. Butler SF, McNaughton EC, Black RA. Tapentadol abuse potential: a postmarketing evaluation using a sample of individuals evaluated for substance abuse treatment. *Pain Medicine* 2015;16(1):119-30.

15. Cepeda MS, Fife D, Kihm MA, et al. Comparison of the risks of shopping behavior and opioid abuse between tapentadol and oxycodone and association of shopping behavior and opioid abuse. *The Clinical journal of pain* 2014;30(12):1051-56.
16. McNaughton EC, Black RA, Weber SE, et al. Assessing abuse potential of new analgesic medications following market release: an evaluation of Internet discussion of tapentadol abuse. *Pain Medicine* 2015;16(1):131-40.
17. Cepeda MS, Fife D, Ma Q, et al. Comparison of the risks of opioid abuse or dependence between tapentadol and oxycodone: results from a cohort study. *The Journal of Pain* 2013;14(10):1227-41.
18. Dart RC, Cicero T, Surratt H, et al. Assessment of the abuse of tapentadol immediate release: the first 24 months. *Journal of opioid management* 2012;8(6):395-402.
19. Perglozzi JV, Schug SA, Raffa RB, et al. Tapentadol and dual pain inhibition: A new strategy for pain relief in Australia. 2015;1
20. Pharmaceutical Benefits Scheme. Tapentadol, tablet, 50mg, 100mg, 150mg, 200mg and 250mg (as hydrochloride) (sustained release), Palexia SR® - November 2013 2013 [Available from: <http://www.pbs.gov.au/info/industry/listing/elements/pbac-meetings/psd/2013-11/tapentadol>].
21. Cairns R, Brown J, Buckley N. The impact of codeine re-scheduling on misuse: a retrospective review of calls to Australia's largest poisons centre. *Addiction* 2016
22. Burns L, Roxburgh A, Bruno R, et al. Monitoring drug markets in the Internet age and the evolution of drug monitoring systems in Australia. *Drug testing and analysis* 2014;6(7-8):840-45.
23. Roxburgh A, Van Buskirk J, Burns L, et al. Drugs and the Internet. Issue 8, May 2017. Sydney: National Drug and Alcohol Research Centre, 2017.
24. Stafford J, Breen C. Australian Drug Trends 2016: Findings from the Illicit Drug Reporting System (IDRS). Sydney: National Drug and Alcohol Research Centre, 2017.
25. Nielsen S, Degenhardt L, Hoban B, et al. Comparing opioids: A guide to estimating oral morphine equivalents (OME) in research. Sydney: National Drug and Alcohol Research Centre, 2014.
26. Zech DF, Grond S, Lynch J, et al. Validation of World Health Organization Guidelines for cancer pain relief: a 10-year prospective study. *Pain* 1995;63(1):65-76.
27. Vandenbroucke JP, Von Elm E, Altman DG, et al. Strengthening the Reporting of Observational Studies in Epidemiology (STROBE): explanation and elaboration. *PLoS medicine* 2007;4(10):e297.

- 1  
2  
3 28. Larance B, Dobbins T, Peacock A, et al. The impacts of a potentially tamper-resistant  
4 oxycodone formulation on opioid use and harms: Main findings from the National  
5 Opioid Medication Abuse Deterrence (NOMAD) study. under review  
6  
7 29. IMS Health. Australian Pharmaceutical Index: IMS Plus workshop manual. Sydney: IMS  
8 Health Australia, 2009.  
9  
10  
11  
12  
13  
14  
15  
16  
17  
18  
19  
20  
21  
22  
23  
24  
25  
26  
27  
28  
29  
30  
31  
32  
33  
34  
35  
36  
37  
38  
39  
40  
41  
42  
43  
44  
45  
46  
47  
48  
49  
50  
51  
52  
53  
54  
55  
56  
57  
58  
59  
60

For peer review only

**Table 1: Summary of the primary outcomes from each data source**

| Research outcome                                                     | Pharmaceutical opioid sales data | Interviews with people who inject drugs | Online drug marketplace data | Poisons Information Centre calls |
|----------------------------------------------------------------------|----------------------------------|-----------------------------------------|------------------------------|----------------------------------|
| <b>Research Question 1: Exposure</b>                                 |                                  |                                         |                              |                                  |
| Population level availability                                        |                                  |                                         |                              |                                  |
| <b>Research Question 2: Extra-Medical Use</b>                        |                                  |                                         |                              |                                  |
| Levels of extra-medical use (diverted)                               |                                  |                                         |                              |                                  |
| Injection                                                            |                                  |                                         |                              |                                  |
| Snorting                                                             |                                  |                                         |                              |                                  |
| Chewing                                                              |                                  |                                         |                              |                                  |
| Perceived availability (diverted)                                    |                                  |                                         |                              |                                  |
| <b>Research Question 3: Attractiveness</b>                           |                                  |                                         |                              |                                  |
| Attractiveness for extra-medical use (market value)                  |                                  |                                         |                              |                                  |
| <b>Research Question 4: Harms</b>                                    |                                  |                                         |                              |                                  |
| Overdose - non-fatal                                                 |                                  |                                         |                              |                                  |
| Intentional exposure (intentional self-poisoning, misuse, and abuse) |                                  |                                         |                              |                                  |

Appendix 1. Data Sources Reviewed for Inclusion

| Source                                                      | Sample             | Geographic Coverage <sup>1</sup>    | Distinguishes opioid type <sup>2</sup> | Distinguishes opioid brand      | Comments                                                                                                                                                                                                                                                                                                                                                                                                                                                                                                                                                       |
|-------------------------------------------------------------|--------------------|-------------------------------------|----------------------------------------|---------------------------------|----------------------------------------------------------------------------------------------------------------------------------------------------------------------------------------------------------------------------------------------------------------------------------------------------------------------------------------------------------------------------------------------------------------------------------------------------------------------------------------------------------------------------------------------------------------|
| <i>Annual/Repeated Data Collections</i>                     |                    |                                     |                                        |                                 |                                                                                                                                                                                                                                                                                                                                                                                                                                                                                                                                                                |
| National Drug Strategy Household Survey (NDSHS)             | Population         | National and all states/territories | Yes                                    | No                              |                                                                                                                                                                                                                                                                                                                                                                                                                                                                                                                                                                |
| National Survey of Mental Health and Wellbeing (NSMHWB)     | Population         | National and all states/territories | No                                     | No                              |                                                                                                                                                                                                                                                                                                                                                                                                                                                                                                                                                                |
| Wastewater data                                             | Population         | National and all states/territories | Yes                                    | No                              |                                                                                                                                                                                                                                                                                                                                                                                                                                                                                                                                                                |
| Ecstasy and Related Drug Reporting System (EDRS) interviews | High-risk sentinel | National and all states/territories | Yes                                    | No                              |                                                                                                                                                                                                                                                                                                                                                                                                                                                                                                                                                                |
| Illicit Drug Reporting System (IDRS) interviews             | High-risk sentinel | National and all states/territories | Yes                                    | Yes                             | Gives opioid type, strength and brand, and includes OTC codeine. Data available from 2017 only                                                                                                                                                                                                                                                                                                                                                                                                                                                                 |
| Drug Use Monitoring in Australia (DUMA)                     | High-risk sentinel | NSW, QLD, SA, WA                    | Yes                                    | No                              |                                                                                                                                                                                                                                                                                                                                                                                                                                                                                                                                                                |
| Australian NSP survey                                       | High-risk sentinel | National and all states/territories | Yes                                    | No                              |                                                                                                                                                                                                                                                                                                                                                                                                                                                                                                                                                                |
| Women and Sexual Health Survey (SWASH)                      | High-risk sentinel | NSW and WA                          | No                                     | No                              |                                                                                                                                                                                                                                                                                                                                                                                                                                                                                                                                                                |
| Gay Community Periodic Survey                               | High-risk sentinel | SA, ACT, VIC, WA, QLD, NSW, TAS     | No                                     | No                              |                                                                                                                                                                                                                                                                                                                                                                                                                                                                                                                                                                |
| <i>Sales and Dispensing Data Collections</i>                |                    |                                     |                                        |                                 |                                                                                                                                                                                                                                                                                                                                                                                                                                                                                                                                                                |
| Prescription sales data                                     | Population         | National and all states/territories | Yes                                    | Yes                             | Gives opioid type, strength and brand, and includes OTC codeine                                                                                                                                                                                                                                                                                                                                                                                                                                                                                                |
| Pharmaceutical Benefits Scheme                              | Population         | National and all states/territories | Yes                                    | Depends on the opioid type/dose | Item codes for pharmaceutical opioids (the unit by which data can be extracted) do not differentiate by brand where multiple brands offer products of the same strength (e.g., four different brands of morphine products fall under item code '1653B: morphine sulfate 10mg modified release tablet') <sup>30</sup> . Further, only medicines contained in the Schedule of Pharmaceutical Benefits appear in these statistics (excluding over-the-counter codeine), and SRF tapentadol was only listed on the Schedule two years post-introduction (in 2013). |
| Medicare Benefits Scheme                                    | Population         | National and all states/territories | No                                     | No                              |                                                                                                                                                                                                                                                                                                                                                                                                                                                                                                                                                                |
| <i>Administrative Data Collections</i>                      |                    |                                     |                                        |                                 |                                                                                                                                                                                                                                                                                                                                                                                                                                                                                                                                                                |
| Poison Information Centre call data                         | Population         | All states/territories              | Yes                                    | Yes                             | Gives opioid type, strength and brand where these characteristics can be identified by the caller, and includes OTC codeine                                                                                                                                                                                                                                                                                                                                                                                                                                    |
| Ambulance data collections                                  | Population         | All states/territories              | No                                     | No                              |                                                                                                                                                                                                                                                                                                                                                                                                                                                                                                                                                                |
| Emergency department data collections                       | Population         | All states/territories              | Depends on the coding system           | No                              |                                                                                                                                                                                                                                                                                                                                                                                                                                                                                                                                                                |
| Admitted patient data collections                           | Population         | National and all states/territories | No                                     | No                              |                                                                                                                                                                                                                                                                                                                                                                                                                                                                                                                                                                |
| Mortality data                                              | Population         | National and all states/territories | No                                     | No                              |                                                                                                                                                                                                                                                                                                                                                                                                                                                                                                                                                                |
| Mental health ambulatory data collections                   | Population         | NSW, VIC, TAS, WA                   | No                                     | No                              |                                                                                                                                                                                                                                                                                                                                                                                                                                                                                                                                                                |
| Alcohol and drug treatment helpline calls                   | Population         | All states/territories              | Depends on the coding system           | No                              |                                                                                                                                                                                                                                                                                                                                                                                                                                                                                                                                                                |
| Needle-syringe programme data                               | High-risk sentinel | National and all states/territories | Depends on the coding system           | No                              |                                                                                                                                                                                                                                                                                                                                                                                                                                                                                                                                                                |
| Medically-supervised injecting clinic data                  | High-risk sentinel | NSW                                 | Depends on the coding system           | No                              |                                                                                                                                                                                                                                                                                                                                                                                                                                                                                                                                                                |
| Prescription monitoring programme data                      | High-risk sentinel | TAS                                 | Yes                                    | Yes                             | Incomplete coverage with continued implementation of the programme, with voluntary opt in by pharmacists and                                                                                                                                                                                                                                                                                                                                                                                                                                                   |

|   |                                          |                    |                                     |     |                                                                                                  |
|---|------------------------------------------|--------------------|-------------------------------------|-----|--------------------------------------------------------------------------------------------------|
|   |                                          |                    |                                     |     | general practitioners, and no requirement for use for every dispensing episode.                  |
| 1 | Pharmacotherapy program data             | Population         | National and all states/territories | Yes | No                                                                                               |
| 2 | Alcohol and drug treatment services data | Population         | National and all states/territories | Yes | No                                                                                               |
| 3 | Arrest data                              | Population         | National and all states/territories | Yes | No                                                                                               |
| 4 | Seizure data                             | Population         | National and all states/territories | Yes | No                                                                                               |
| 5 | Street price data                        | Population         | National and all states/territories | Yes | No                                                                                               |
| 6 | Criminal court data                      | Population         | National and all states/territories | Yes | No                                                                                               |
| 7 | <i>Online Monitoring</i>                 |                    |                                     |     |                                                                                                  |
| 8 | Online marketplace monitoring            | High-risk sentinel | National                            | Yes | Yes                                                                                              |
| 9 |                                          |                    |                                     |     | Gives opioid brand/dose for sale on online marketplaces. Data is only available from early 2013. |

10 **Note.** <sup>1</sup> National: collated and reported at national level only; National and all states/territories: collated and reported at national and state/territory-level; All  
11 states/territories: collated and reported at the state/territory level only. <sup>2</sup> Distinguishes between types of opioids (e.g., morphine and oxycodone). NSW: New South Wales;  
12 QLD: Queensland; SA: South Australia; WA: Western Australia; TAS: Tasmania; Australian Capital Territory; VIC: Victoria.

# BMJ Open

## Opioid Use and Harms Associated with a Sustained-Released Tapentadol Formulation: A Post-Marketing Study Protocol

|                                 |                                                                                                                                                                                                                                                                                                                                                                                                                                                                                                                |
|---------------------------------|----------------------------------------------------------------------------------------------------------------------------------------------------------------------------------------------------------------------------------------------------------------------------------------------------------------------------------------------------------------------------------------------------------------------------------------------------------------------------------------------------------------|
| Journal:                        | <i>BMJ Open</i>                                                                                                                                                                                                                                                                                                                                                                                                                                                                                                |
| Manuscript ID                   | bmjopen-2017-020006.R2                                                                                                                                                                                                                                                                                                                                                                                                                                                                                         |
| Article Type:                   | Protocol                                                                                                                                                                                                                                                                                                                                                                                                                                                                                                       |
| Date Submitted by the Author:   | 12-Feb-2018                                                                                                                                                                                                                                                                                                                                                                                                                                                                                                    |
| Complete List of Authors:       | Peacock, Amy; National Drug and Alcohol Research Centre; School of Medicine<br>Larance, Briony; University of New South Wales, National Drug and Alcohol Research Centre<br>Farrell, Michael; University of New South Wales, National Drug and Alcohol Research Centre<br>Cairns, Rose; University of Sydney, School of Medical Sciences<br>Buckley, Nicholas; University of Sydney, School of Medical Sciences<br>Degenhardt, Louisa; University of New SouthWales, National Drug and Alcohol Research Centre |
| <b>Primary Subject Heading</b>: | Addiction                                                                                                                                                                                                                                                                                                                                                                                                                                                                                                      |
| Secondary Subject Heading:      | Addiction, Epidemiology, Public health                                                                                                                                                                                                                                                                                                                                                                                                                                                                         |
| Keywords:                       | tapentadol, pharmaceutical opioid, tamper, Substance misuse < PSYCHIATRY, harm, Overdose                                                                                                                                                                                                                                                                                                                                                                                                                       |
|                                 |                                                                                                                                                                                                                                                                                                                                                                                                                                                                                                                |

SCHOLARONE™  
Manuscripts

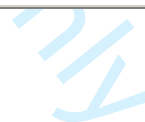

1  
2  
3  
4  
5  
6  
7  
8  
9

## Opioid Use and Harms Associated with a Sustained-Released Tapentadol Formulation: A Post-Marketing Study Protocol

10 Amy Peacock<sup>1,2</sup>, Briony Larance<sup>1</sup>, Michael Farrell<sup>1</sup>, Rose Cairns<sup>3,4</sup>, Nicholas Buckley<sup>3,4</sup>, & Louisa  
11 Degenhardt<sup>1,5,6,7</sup>  
12

- 13  
14 1. National Drug and Alcohol Research Centre, University of New South Wales, NSW, Australia  
15 2. School of Medicine, University of Tasmania, TAS, Australia  
16 3. NSW Poisons Information Centre, The Children's Hospital at Westmead, NSW, Australia  
17 4. School of Medical Sciences, University of Sydney, Sydney, NSW  
18 5. School of Population and Global Health, University of Melbourne, VIC, Australia  
19 6. Murdoch Children's Research Institute, Australia  
20 7. Department of Global Health, School of Public Health, University of Washington, USA  
21  
22  
23  
24  
25  
26  
27  
28  
29  
30  
31  
32

33 **Word Count:** 2,636  
34

35 **Corresponding author:** Amy Peacock, Research Fellow, National Drug and Alcohol Research Centre,  
36 University of New South Wales, e: [amy.peacock@unsw.edu.au](mailto:amy.peacock@unsw.edu.au), t: +61 2 9385 0333, f: +61 2 9385  
37 0222.  
38  
39  
40  
41  
42  
43  
44  
45  
46  
47  
48  
49  
50  
51  
52  
53  
54  
55  
56  
57  
58  
59  
60



## ABSTRACT

**Introduction:** It has been argued that pharmacologically tapentadol may have lower abuse potential than other pharmaceutical opioids currently available. However, there has been no comprehensive triangulation of data regarding use and harms associated with this formulation. A sustained-release formulation (SRF) of tapentadol (Palexia®) was released in Australia in 2011 and listed for public subsidy in 2013. We summarise here the methods of a post-marketing study which will measure post-introduction: i) population level availability, ii) extra-medical use and diversion, iii) attractiveness for extra-medical use, and iv) associated harms, of tapentadol compared against other pharmaceutical opioids.

**Methods and Analysis:** We evaluated key sources on pharmaceutical use and harms in Australia, and were limited to triangulating data from four sources that disaggregate pharmaceutical opioid formulations and captured the tapentadol SRF. These data sources comprised: i) national pharmaceutical opioid community sales data from 2011-2017, ii) national pharmaceutical opioid poisonings reported to Poison Information Centres from 2011-2017, iii) number of vendors on online marketplaces listing pharmaceutical opioids for sale, and iv) data on pharmaceutical opioid extra-medical use, attractiveness, and harms from interviews with people who inject drugs in Australia.

**Ethics and Dissemination:** Ethics approval is not required for use of pharmaceutical sales data. Ethics approval has been obtained for use of national pharmaceutical opioid poisonings reported to Poison Information Centres (LNR/16/SCHN/44) and for use of online marketplace data and interview data from people who inject drugs (HC12086). Key findings will be published mid-2018 in a peer-reviewed academic journal, and presented at various conferences and professional meetings.

**Keywords:** opioid; tapentadol; overdose; tamper; substance misuse; harm

### STRENGTHS AND LIMITATIONS

- This study will comprise the first published comprehensive assessment of tapentadol SRF use, extra-medical use, attractiveness for extra-medical use, and associated harms.
- The number of data sources is limited relative to other post-marketing studies of pharmaceutical opioids as tapentadol is rarely coded separate to other pharmaceutical opioids in administrative data.
- However, this study will overview a wealth of data from the general population and a group at high risk for extra-medical use, both of which are key to examine when quantifying various impacts of pharmaceutical opioids.
- These findings will have relevance to other countries where tapentadol has recently been introduced or where it may be introduced in the future.

## INTRODUCTION

In the past two decades, there has been an increase in the number of pharmaceutical opioids available, and in the prescribing of these drugs, in several high-income countries, including North America and Australia<sup>1</sup>. Indeed, between 1992-2012 the number of pharmaceutical opioid dispensing episodes increased fifteen-fold in Australia<sup>2</sup>. This increase in availability in Australia has been accompanied by greater rates of extra-medical use, defined as use outside the bounds of a doctor's prescription<sup>3</sup>. The risk of opioid dependence and serious adverse events (e.g., overdose) associated with extra-medical use has made addressing this problem a public health imperative<sup>4,5</sup>.

Opioids differ in the extent to which they are likely to be associated with hazardous patterns of use due to different potencies (i.e., weak to strong opioids), pharmacokinetic characteristics (e.g., rate of metabolism) and propensities for dependence<sup>6</sup>. The need to reduce extra-medical use must also be balanced against the need for access to opioid therapy for pain. Thus, current public health agency strategies to reduce extra-medical pharmaceutical opioid use and chronic pain prescribing guidelines focus on products which have limited or no abuse potential<sup>7,8</sup>.

Tapentadol is a centrally acting opioid analgesic with dual mechanisms of action, specifically  $\mu$ -opioid receptor agonist and noradrenaline reuptake inhibition. This dual action is thought to result in a lower dose required to produce a given level of analgesia<sup>9</sup>. Clinical trials suggest that tapentadol provides equivalent or superior levels of pain relief for acute and chronic pain similar to oxycodone and morphine, with greater gastro-intestinal tolerability in terms of reduced rates of nausea, vomiting, and constipation<sup>10-13</sup>.

A recent review by the World Health Organization's Expert Committee on Drug Dependence<sup>11</sup> concluded that potential for abuse for tapentadol may be similar to or slightly lower than other opioids such as hydromorphone, oxycodone, morphine and tramadol. However, they note that these conclusions are tentative given a lack of data regarding tapentadol "abuse, dependence, diversion, recreational use, or poison control", noting that tapentadol generally does not feature in drug use surveys or surveillance reports. The few studies which have been conducted are based on US samples, and using treatment-seeking populations<sup>14</sup> or evaluation of internet discussions<sup>15,16</sup> and prescribing data<sup>17</sup> to assess extra-medical use, with early indications of rates of abuse and diversion equivalent to hydromorphone and lower than oxycodone and most other strong opioids<sup>14,18</sup>.

1  
2  
3 The immediate release form of tapentadol is registered in Australia for moderate to severe pain,  
4 while the sustained release form is registered for severe pain which requires constant opioid  
5 treatment and for which no other opioid other treatments are adequate<sup>19</sup>. Although a sustained-  
6 release formulation of tapentadol (SRF; Palexia® SR) was released in Australia in 2011, and listed for  
7 subsidy on the Pharmaceutical Benefits Scheme in November 2013<sup>20</sup>, no research into rates into  
8 dispensing, extra-medical use, and associated harms of the tapentadol SRF has been undertaken in  
9 Australia. Given the broader context of rising rates of pharmaceutical opioid use and harms  
10 (including overdose), monitoring new formulations in terms of population level pharmaceutical  
11 opioid use, and extra-medical use amongst high risk populations (e.g., those reporting extra-medical  
12 use of other pharmaceutical use) is critical.

13  
14  
15  
16  
17  
18  
19  
20 This paper outlines the design for a national post-marketing study of use, extra-medical use, and  
21 harms associated with introduction of the tapentadol SRF in Australia. This study will integrate  
22 population and sentinel high-risk population data, including national pharmaceutical opioid sales  
23 data, interviews with people who inject drugs, and national opioid-related poisoning event data.  
24  
25  
26  
27  
28

## 29 **METHODS AND ANALYSIS**

### 30 **Study aims**

31  
32 The overarching aim of this study is to identify extra-medical use and diversion of tapentadol SRF,  
33 attractiveness for extra-medical use, and associated levels of harms compared to these indicators for  
34 other pharmaceutical opioid use. The specific questions we aim to answer are as follows:  
35  
36

- 37 1. What is the population level availability of the tapentadol SRF in Australia relative to other  
38 pharmaceutical opioids?
- 39 2. Are there indications of extra-medical use of the tapentadol SRF (specifically, non-prescribed  
40 use, use via routes that require tampering), and how does this compare to other  
41 pharmaceutical opioids?
- 42 3. What is the relative attractiveness for extra-medical use (e.g., street price) of the tapentadol  
43 SRF, and how does this compare to other pharmaceutical opioids?
- 44 4. Are there indications of associated harm with the tapentadol SRF (specifically, self-reported  
45 non-fatal overdose, as well as intentional poisoning, extra-medical use and abuse as  
46 identified through poison information centre data), and how does this compare to other  
47 pharmaceutical opioids?
- 48  
49  
50  
51  
52  
53  
54  
55  
56  
57  
58  
59  
60

### Study design and setting

This study is being conducted in Australia. There are three main components of this study: analyses of existing routine data sources (2011-2017); analyses of data from monitoring online drug marketplaces (2013-2017); and analyses of cross-sectional data collected from a high-risk sentinel group (people who inject drugs) participating in the Illicit Drug Reporting System (IDRS) in 2016.

Most indicator data sets in Australia do not routinely separate tapentadol from other pharmaceutical opioids, precluding any comparison of population-level availability (see Appendix 1). Five data sources were identified which could provide data specific to pharmaceutical opioid brand, thus allowing analysis of use and harms related to tapentadol SRF. Prescription monitoring programme data, although theoretically useful, only exist in one jurisdiction, where registration is voluntary and implementation is not complete or consistent, and utilisation of this programme irregular. Consequently, four data sources were included in this study: pharmaceutical opioid sales data; poison information centre call data; online drug marketplace data; and interviews with people who inject drugs. **Table 1** outlines the relevant outcome for each data source for each research question.

**\*\*Table 1 approximately here\*\***

#### *Pharmaceutical opioid sales data*

A third-party access request to obtain pharmaceutical sales data in Australia was approved by IMS Health. These data include all pharmaceutical opioid purchases through pharmaceutical wholesalers and manufacturers who sold direct to pharmacies between 2011 and 2017. Data reflects community sales only, excluding sales to hospitals. However, due to the legal requirements for secure storage of pharmaceuticals in pharmacies, and monitoring and recording of opioids depending on their schedule listing, the number of packs sold over a 12 month period closely approximates the number used.

All opioids available in Australia that are indicated for pain can be included and coded according to the World Health Organization's Anatomical Therapeutic Classification system code of A02A 'opioids' and A02B 'other analgesics and antipyretics'. This includes, but is not limited to, tapentadol (N02AX06), buprenorphine (N02AE01), prescription and over-the-counter codeine (N02BA51, N02BE51, N02AA59, R05DA04), dextropropoxyphene (N02AC04, N02AC54), fentanyl (N02AB03), hydromorphone (N02AA03), methadone (N02AC52), morphine (N02AA01), and oxycodone

1  
2  
3 (N02AA05, N02AA55). Injectable formulations are excluded, being mainly prescribed in hospitals,  
4 and formulations of methadone and buprenorphine used solely for the treatment of opioid  
5 dependence are excluded. However, over-the-counter codeine is captured in this data source. IMS  
6 Health data can be provided from January 2011 to December 2017 aggregated monthly broken  
7 down by opioid formulation, brand, strength, and geographic unit.  
8  
9  
10

#### 11 *Poison Information Centre call data*

12  
13 Four Poison Information Centres (PICs) in Australia, based in New South Wales, Queensland, Victoria  
14 and Western Australia, together provide nationwide, round-the-clock poisoning advice to healthcare  
15 professionals and members of the public. National data will be extracted regarding number of cases  
16 of pharmaceutical opioid exposure poisonings (including over-the-counter codeine) reported to PICs.  
17 Specifically, opioid-related calls will only be extracted where the exposure type/intent is coded as  
18 'recreational', so as to identify exposures where pharmaceutical opioids were taken for its  
19 intoxicating effects<sup>21</sup>. Where the intentional exposure subtype is not available or unclear, calls  
20 regarding opioids will undergo a free-text search for markers of extra-medical use and abuse  
21 (defined here as use of a drug in a way or for a purpose outside intended medical use, e.g., excess  
22 quantity, recreational use, use for non-approved purposes), then manually reviewed by PIC staff and  
23 recoded.  
24  
25  
26  
27  
28  
29  
30  
31

32  
33 Unit-level data collected between January 2011 and December 2017 will be extracted. Data fields to  
34 be extracted include call date, age group, gender, state/territory, dose, brand, active ingredients,  
35 and route of exposure.  
36  
37  
38

#### 39 *Online drug marketplace data*

40  
41 An existing surveillance system in Australia monitors availability and types of substances sold online  
42 via the darknet<sup>22 23</sup>. The darknet is accessible only via The Onion Router (TOR), software that enables  
43 anonymous communication. Cryptomarkets (markets operating on the darknet) have been accessed  
44 weekly since 2013 using a dedicated user account. Exhaustive snapshots of each accessible  
45 marketplace are taken, including details of vendor name, listing description and, where possible,  
46 country of origin. For this study, the number of vendors listing illicit pharmaceutical opioids for sale  
47 on cryptomarkets between January 2013 and December 2017 will be extracted by brand and by  
48 month. This data cannot provide any information about consumers who are buying drugs on the  
49 cryptomarkets, or any data on the total number of sales via these sites. However, it does yield timely  
50 and sensitive information regarding drug availability online.  
51  
52  
53  
54  
55  
56  
57  
58  
59  
60

### *Illicit Drug Reporting System data*

The Illicit Drug Reporting System (IDRS) is a national illicit drug monitoring system, one part of which comprises annual interviews with ~900 people who inject drugs interviewed in each capital city in Australia. Participants are recruited using multiple methods, including advertisements in street press, newspapers, treatment agencies, needle and syringe programs, and peer referral. To be eligible to participate, participants need to be at least 17 years of age; have injected at least monthly during the six months preceding interview; and have been a resident for at least 12 months in the capital city in which they are interviewed. The interview is administered by trained research staff face-to-face at a time and location convenient to them, and participants receive \$AUD40 reimbursement.

The core quantitative interview monitors patterns of drug use and includes questions on price, purity and availability of the main drug types, including pharmaceutical opioids<sup>24</sup>. Data will be used from the 2017 interview (conducted May-June 2017), which included additional items around tapentadol SRF use. These items pertained to:

- Levels of tapentadol extra-medical use: diverted Palexia® SR, swallowed, injected, smoked, snorted (past six month use and number of days)
- Other opioid use (pharmaceuticals and heroin): swallowed, injected, smoked, snorted (past six month use and number of days)
- Street (diverted) price and perceived availability of diverted tapentadol and other opioids
- Attractiveness of tapentadol for use via injection
- Overdose (each opioid).

### **Data analysis**

#### *Population-level data*

Opioid utilisation (IMS Health) and intentional pharmaceutical opioid exposure poisonings (PIC) data will be presented graphically over time by opioid type, opioid formulation and, where available tablet strength (nationally and by jurisdiction). Opioid utilisation data will be presented as number of packs and number of oral morphine equivalent (OME) grams; the latter will be computed using published conversion guidelines<sup>25</sup>. Percentage of total OME/packs will be calculated for tapentadol and other opioid formulations to graph the underlying rate of sales. Trends over time in tapentadol sales will be assessed using negative binomial or poisson generalised estimating equations (to take into account non-independence), including variables to account for time/seasonality.

PIC data will be presented as rates of intentional pharmaceutical opioid exposure poisonings using IMS sales data as the denominator; specifically, rates per 100,000 OME grams and per 1,000 packs distributed per month. These analyses will be restricted to those cases explicitly identified as a pharmaceutical opioid exposure poisoning attributable to a type of opioid (e.g., tapentadol, oxycodone) as per the criteria identified above. Trends over time in tapentadol exposures will also be modelled using generalised estimating equations.

Various comparators will be used for these analyses, including specific pharmaceutical opioid formulations (e.g., tramadol, oxycodone), and opioids grouped as per WHO guidelines<sup>26</sup> into *strong prescription opioids* (buprenorphine, fentanyl, hydromorphone, methadone, morphine and oxycodone; all listed as 'Schedule 8' opioids in Australian classification of medicines and poisons), *other prescription opioids* (prescribed codeine, dextropropoxyphene, and tramadol; 'Schedule 4' in Australia) and *over-the-counter opioids* (codeine products available at pharmacies without a prescription).

#### *Sentinel data*

Cryptomarket and IDRS data will be described using descriptive statistics, with the former graphed as number of vendors for SRF tapentadol and other pharmaceutical opioid formulations by month. Parametric and non-parametric tests of significance, as well as measures of effect size, will be used to describe differences in rates of extra-medical use, diversion, attractiveness, and overdose for tapentadol versus other opioid formulations.

### **ETHICS AND DISSEMINATION**

The authors confirm ethics approval is not required for pharmaceutical sales data. The IDRS has received ethical approval from the University of New South Wales Human Research Ethics Committee (HC12086), as well as from the relevant ethics committees in each jurisdiction. Participants provided informed consent prior to completing the interview. The Sydney Children's Hospitals Network Human Research Ethics Committee has approved the use of data collected by the PIC (*Retrospective review of incidence and toxicity of various exposures from calls to Australian Poisons Information Centres*; LNR/16/SCHN/44).

We plan to publish our findings mid-2018 in a peer-reviewed journal article as per the data sources and outcomes listed in Table 1 and research questions specified in the aims above, and these



1  
2  
3 findings will also be presented at conferences. Publications will comply with STROBE guidelines <sup>27</sup>.  
4 Restrictions will apply to the availability of these data as they are used with approval from data  
5 custodians for the purposes of this study, but they may be available following approval from the  
6 researchers, custodians of the data, and any other involved third party.  
7  
8  
9

## 10 **DISCUSSION**

11  
12 This post-marketing study forms part of a growing body of literature detailing comprehensive and  
13 transparent monitoring of specific pharmaceutical opioid formulations in regards to key indicators of  
14 use, extra-medical use, and harms <sup>28</sup>. Concern is growing regarding rates of pharmaceutical opioid  
15 extra-medical use and harms. Consequently, it is important to determine how shifts in the  
16 pharmaceutical opioid market, including availability of new formulations, plays out in terms of these  
17 outcomes. There has been no such undertaking for tapentadol globally, despite availability in the US  
18 for nearly a decade, and indications of a small but growing pharmaceutical opioid market share <sup>17</sup>,  
19 making the current study critical.  
20  
21  
22  
23  
24  
25

26  
27 It should be noted that this study is limited in terms of the number of available data sources relative  
28 to other post-marketing studies <sup>28</sup>. However, this is a systems-level issue, as tapentadol is not  
29 differentiated from other pharmaceutical opioids in most healthcare and law enforcement data  
30 coding systems. There are a number of limitations to the chosen data sources. IDRS reflects a  
31 sentinel population at high risk of extra-medical use, and thus will not reflect general population  
32 extra-medical use, nor will it cover all aspects of various outcomes (e.g., street price is only one  
33 aspect of pharmaceutical opioid attractiveness for extra-medial use). Further, IMS Health sales data  
34 does not index the number of individuals prescribed opioids, and PIC data does not index all  
35 individuals with an adverse event, captured in other healthcare sources. However, IMS data is  
36 estimated to cover over 94% of all sales nationally <sup>29</sup>, making it strong index of pharmaceutical  
37 opioid exposure in the community. Similarly, PIC data has complete coverage nationally and  
38 captures details related to type of exposure and dose critical to understanding risk of adverse  
39 exposure. We would also argue that online drug marketplace data and IDRS are necessary and key  
40 sentinel data sources, being established to identify emerging trends in drug use. IDRS participants  
41 typically report injecting heroin, methamphetamine and/or pharmaceutical opioids <sup>24</sup>, making valid  
42 comparison across these substances and across jurisdictions with varying levels of heroin and  
43 pharmaceutical opioid availability.  
44  
45  
46  
47  
48  
49  
50  
51  
52  
53  
54  
55  
56  
57  
58  
59  
60

1  
2  
3 In light of these strengths, we think that triangulation of these sources will provide a clear picture of  
4 tapentadol use, extra-medical use, attractiveness and associated harms. We believe these findings  
5 will be critical to understanding possible risks in terms of extra-medical use and harms if tapentadol  
6 prescribing increases. More broadly though, these findings will help to enhance understanding as to  
7 the impact changes in the pharmaceutical opioid market can have on extra-medical use and harms  
8 from a policy, industry, clinician and research perspective.  
9  
10  
11  
12  
13  
14  
15  
16  
17  
18  
19  
20  
21  
22  
23  
24  
25  
26  
27  
28  
29  
30  
31  
32  
33  
34  
35  
36  
37  
38  
39  
40  
41  
42  
43  
44  
45  
46  
47  
48  
49  
50  
51  
52  
53  
54  
55  
56  
57  
58  
59  
60

For peer review only

### ACKNOWLEDGEMENTS

Thank you to Jared Brown of the NSW Poison Information Centre for his advice on the study protocol.

### COMPETING INTERESTS

Some of the investigators have received investigator-initiated untied educational grants from Reckitt Benckiser/Indivior for studies of buprenorphine-naloxone (BL, LD), buprenorphine depot (BL, LD, MF), naloxone (LD, MF), the development of an opioid-related behavior scale (BL, LD), the pharmacogenetic predictors of treatment success (RA), and a study of opioid substitution therapy uptake among chronic non-cancer pain patients (BL, LD). Some of the investigators have also received investigator-initiated untied educational grants from Mundipharma for post-marketing surveillance of a tamper-resistant opioid formulation (AP, BL, LD, MF).

### FUNDING STATEMENT

This work was supported by investigator-initiated untied educational grant funding from Seqirus Pty Ltd (the marketer of tapentadol SRF in Australia), granted to AP, BL, MF, RC, and LD. The funder had no role in the design, conduct or interpretation of the study's findings. BL, AP and LD are supported by NHMRC research fellowships (#1073858, #1109366 and #1041472). The National Drug and Alcohol Research Centre at UNSW Australia is supported by funding from the Australian Government under the Substance Misuse Prevention and Service Improvements Grant Fund.

### AUTHORS' CONTRIBUTIONS

LD, AP, BL, MF, NB, and RC contributed to the development of the study for the purposes of the funding proposal and development of the study design. LD, AP, and BL led writing of the first draft. All authors contributed to the critical review of the manuscript. All authors read and approved the final manuscript.

## REFERENCES

1. Karanges EA, Blanch B, Buckley NA, et al. Twenty-five years of prescription opioid use in Australia: a whole-of-population analysis using pharmaceutical claims. *British journal of clinical pharmacology* 2016
2. Blanch B, Pearson SA, Haber PS. An overview of the patterns of prescription opioid use, costs and related harms in Australia. *British journal of clinical pharmacology* 2014;78(5):1159-66.
3. Larance B, Degenhardt L, Lintzeris N, et al. Definitions related to the use of pharmaceutical opioids: Extramedical use, diversion, non-adherence and aberrant medication-related behaviours. *Drug and alcohol review* 2011;30(3):236-45.
4. Compton WM, Volkow ND. Major increases in opioid analgesic abuse in the United States: concerns and strategies. *Drug and alcohol dependence* 2006;81(2):103-07.
5. Compton WM, Volkow ND. Abuse of prescription drugs and the risk of addiction. *Drug and alcohol dependence* 2006;83:S4-S7.
6. Drewes AM, Jensen RD, Nielsen LM, et al. Differences between opioids: pharmacological, experimental, clinical and economical perspectives. *British journal of clinical pharmacology* 2013;75(1):60-78.
7. US Food and Drug Administration. FDA Opioids Action Plan 2016 [Available from: <http://www.fda.gov/NewsEvents/Newsroom/FactSheets/ucm484714.htm>.
8. Manchikanti L, Abdi S, Atluri S, et al. American Society of Interventional Pain Physicians (ASIPP) guidelines for responsible opioid prescribing in chronic non-cancer pain: Part 2--guidance. *Pain physician* 2012;15(3 Suppl):S67-116.
9. Kress HG. Tapentadol and its two mechanisms of action: Is there a new pharmacological class of centrally-acting analgesics on the horizon? *European journal of pain* 2010;14(8):781-83.
10. Riemsma R, Forbes C, Harker J, et al. Systematic review of tapentadol in chronic severe pain. *Current medical research and opinion* 2011;27(10):1907-30.
11. World Health Organisation. Tapentadol: Critical review report. 2014
12. Vorsanger G, Xiang J, Okamoto A, et al. Evaluation of study discontinuations with tapentadol immediate release and oxycodone immediate release in patients with low back or osteoarthritis pain. *Journal of opioid management* 2009;6(3):169-79.
13. Vadivelu N, Timchenko A, Huang Y, et al. Tapentadol extended-release for treatment of chronic pain: a review. *Journal of pain research* 2011;4:211.
14. Butler SF, McNaughton EC, Black RA. Tapentadol abuse potential: a postmarketing evaluation using a sample of individuals evaluated for substance abuse treatment. *Pain Medicine* 2015;16(1):119-30.

15. Cepeda MS, Fife D, Kihm MA, et al. Comparison of the risks of shopping behavior and opioid abuse between tapentadol and oxycodone and association of shopping behavior and opioid abuse. *The Clinical journal of pain* 2014;30(12):1051-56.
16. McNaughton EC, Black RA, Weber SE, et al. Assessing abuse potential of new analgesic medications following market release: an evaluation of Internet discussion of tapentadol abuse. *Pain Medicine* 2015;16(1):131-40.
17. Cepeda MS, Fife D, Ma Q, et al. Comparison of the risks of opioid abuse or dependence between tapentadol and oxycodone: results from a cohort study. *The Journal of Pain* 2013;14(10):1227-41.
18. Dart RC, Cicero T, Surratt H, et al. Assessment of the abuse of tapentadol immediate release: the first 24 months. *Journal of opioid management* 2012;8(6):395-402.
19. Perglozzi JV, Schug SA, Raffa RB, et al. Tapentadol and dual pain inhibition: A new strategy for pain relief in Australia. 2015;1
20. Pharmaceutical Benefits Scheme. Tapentadol, tablet, 50mg, 100mg, 150mg, 200mg and 250mg (as hydrochloride) (sustained release), Palexia SR® - November 2013 2013 [Available from: <http://www.pbs.gov.au/info/industry/listing/elements/pbac-meetings/psd/2013-11/tapentadol>].
21. Cairns R, Brown J, Buckley N. The impact of codeine re-scheduling on misuse: a retrospective review of calls to Australia's largest poisons centre. *Addiction* 2016
22. Burns L, Roxburgh A, Bruno R, et al. Monitoring drug markets in the Internet age and the evolution of drug monitoring systems in Australia. *Drug testing and analysis* 2014;6(7-8):840-45.
23. Roxburgh A, Van Buskirk J, Burns L, et al. Drugs and the Internet. Issue 8, May 2017. Sydney: National Drug and Alcohol Research Centre, 2017.
24. Stafford J, Breen C. Australian Drug Trends 2016: Findings from the Illicit Drug Reporting System (IDRS). Sydney: National Drug and Alcohol Research Centre, 2017.
25. Nielsen S, Degenhardt L, Hoban B, et al. Comparing opioids: A guide to estimating oral morphine equivalents (OME) in research. Sydney: National Drug and Alcohol Research Centre, 2014.
26. Zech DF, Grond S, Lynch J, et al. Validation of World Health Organization Guidelines for cancer pain relief: a 10-year prospective study. *Pain* 1995;63(1):65-76.
27. Vandenbroucke JP, Von Elm E, Altman DG, et al. Strengthening the Reporting of Observational Studies in Epidemiology (STROBE): explanation and elaboration. *PLoS medicine* 2007;4(10):e297.

- 1  
2  
3 28. Larance B, Dobbins T, Peacock A, et al. The impacts of a potentially tamper-resistant  
4 oxycodone formulation on opioid use and harms: Main findings from the National  
5 Opioid Medication Abuse Deterrence (NOMAD) study. under review  
6  
7 29. IMS Health. Australian Pharmaceutical Index: IMS Plus workshop manual. Sydney: IMS  
8 Health Australia, 2009.  
9  
10  
11  
12  
13  
14  
15  
16  
17  
18  
19  
20  
21  
22  
23  
24  
25  
26  
27  
28  
29  
30  
31  
32  
33  
34  
35  
36  
37  
38  
39  
40  
41  
42  
43  
44  
45  
46  
47  
48  
49  
50  
51  
52  
53  
54  
55  
56  
57  
58  
59  
60

For peer review only

**Table 1: Summary of the primary outcomes from each data source**

| Research outcome                                                     | Pharmaceutical opioid sales data | Interviews with people who inject drugs | Online drug marketplace data | Poisons Information Centre calls |
|----------------------------------------------------------------------|----------------------------------|-----------------------------------------|------------------------------|----------------------------------|
| <b>Research Question 1: Exposure</b>                                 |                                  |                                         |                              |                                  |
| Population level availability                                        |                                  |                                         |                              |                                  |
| <b>Research Question 2: Extra-Medical Use</b>                        |                                  |                                         |                              |                                  |
| Levels of extra-medical use (diverted)                               |                                  |                                         |                              |                                  |
| Injection                                                            |                                  |                                         |                              |                                  |
| Snorting                                                             |                                  |                                         |                              |                                  |
| Chewing                                                              |                                  |                                         |                              |                                  |
| Perceived availability (diverted)                                    |                                  |                                         |                              |                                  |
| <b>Research Question 3: Attractiveness</b>                           |                                  |                                         |                              |                                  |
| Attractiveness for extra-medical use (market value)                  |                                  |                                         |                              |                                  |
| <b>Research Question 4: Harms</b>                                    |                                  |                                         |                              |                                  |
| Overdose - non-fatal                                                 |                                  |                                         |                              |                                  |
| Intentional exposure (intentional self-poisoning, misuse, and abuse) |                                  |                                         |                              |                                  |

For peer review only

## Appendix 1. Data Sources Reviewed for Inclusion

| Source                                                      | Sample             | Geographic Coverage <sup>1</sup>    | Distinguishes opioid type <sup>2</sup> | Distinguishes opioid brand      | Comments                                                                                                                                                                                                                                                                                                                                                                                                                                                                                                                                                       |
|-------------------------------------------------------------|--------------------|-------------------------------------|----------------------------------------|---------------------------------|----------------------------------------------------------------------------------------------------------------------------------------------------------------------------------------------------------------------------------------------------------------------------------------------------------------------------------------------------------------------------------------------------------------------------------------------------------------------------------------------------------------------------------------------------------------|
| <i>Annual/Repeated Data Collections</i>                     |                    |                                     |                                        |                                 |                                                                                                                                                                                                                                                                                                                                                                                                                                                                                                                                                                |
| National Drug Strategy Household Survey (NDSHS)             | Population         | National and all states/territories | Yes                                    | No                              |                                                                                                                                                                                                                                                                                                                                                                                                                                                                                                                                                                |
| National Survey of Mental Health and Wellbeing (NSMHWB)     | Population         | National and all states/territories | No                                     | No                              |                                                                                                                                                                                                                                                                                                                                                                                                                                                                                                                                                                |
| Wastewater data                                             | Population         | National and all states/territories | Yes                                    | No                              |                                                                                                                                                                                                                                                                                                                                                                                                                                                                                                                                                                |
| Ecstasy and Related Drug Reporting System (EDRS) interviews | High-risk sentinel | National and all states/territories | Yes                                    | No                              |                                                                                                                                                                                                                                                                                                                                                                                                                                                                                                                                                                |
| Illicit Drug Reporting System (IDRS) interviews             | High-risk sentinel | National and all states/territories | Yes                                    | Yes                             | Gives opioid type, strength and brand, and includes OTC codeine. Data available from 2017 only                                                                                                                                                                                                                                                                                                                                                                                                                                                                 |
| Drug Use Monitoring in Australia (DUMA)                     | High-risk sentinel | NSW, QLD, SA, WA                    | Yes                                    | No                              |                                                                                                                                                                                                                                                                                                                                                                                                                                                                                                                                                                |
| Australian NSP survey                                       | High-risk sentinel | National and all states/territories | Yes                                    | No                              |                                                                                                                                                                                                                                                                                                                                                                                                                                                                                                                                                                |
| Women and Sexual Health Survey (SWASH)                      | High-risk sentinel | NSW and WA                          | No                                     | No                              |                                                                                                                                                                                                                                                                                                                                                                                                                                                                                                                                                                |
| Gay Community Periodic Survey                               | High-risk sentinel | SA, ACT, VIC, WA, QLD, NSW, TAS     | No                                     | No                              |                                                                                                                                                                                                                                                                                                                                                                                                                                                                                                                                                                |
| <i>Sales and Dispensing Data Collections</i>                |                    |                                     |                                        |                                 |                                                                                                                                                                                                                                                                                                                                                                                                                                                                                                                                                                |
| Prescription sales data                                     | Population         | National and all states/territories | Yes                                    | Yes                             | Gives opioid type, strength and brand, and includes OTC codeine                                                                                                                                                                                                                                                                                                                                                                                                                                                                                                |
| Pharmaceutical Benefits Scheme                              | Population         | National and all states/territories | Yes                                    | Depends on the opioid type/dose | Item codes for pharmaceutical opioids (the unit by which data can be extracted) do not differentiate by brand where multiple brands offer products of the same strength (e.g., four different brands of morphine products fall under item code '1653B: morphine sulfate 10mg modified release tablet') <sup>30</sup> . Further, only medicines contained in the Schedule of Pharmaceutical Benefits appear in these statistics (excluding over-the-counter codeine), and SRF tapentadol was only listed on the Schedule two years post-introduction (in 2013). |
| Medicare Benefits Scheme                                    | Population         | National and all states/territories | No                                     | No                              |                                                                                                                                                                                                                                                                                                                                                                                                                                                                                                                                                                |
| <i>Administrative Data Collections</i>                      |                    |                                     |                                        |                                 |                                                                                                                                                                                                                                                                                                                                                                                                                                                                                                                                                                |
| Poison Information Centre call data                         | Population         | All states/territories              | Yes                                    | Yes                             | Gives opioid type, strength and brand where these characteristics can be identified by the caller, and includes OTC codeine                                                                                                                                                                                                                                                                                                                                                                                                                                    |
| Ambulance data collections                                  | Population         | All states/territories              | No                                     | No                              |                                                                                                                                                                                                                                                                                                                                                                                                                                                                                                                                                                |
| Emergency department data collections                       | Population         | All states/territories              | Depends on the coding system           | No                              |                                                                                                                                                                                                                                                                                                                                                                                                                                                                                                                                                                |
| Admitted patient data collections                           | Population         | National and all states/territories | No                                     | No                              |                                                                                                                                                                                                                                                                                                                                                                                                                                                                                                                                                                |
| Mortality data                                              | Population         | National and all states/territories | No                                     | No                              |                                                                                                                                                                                                                                                                                                                                                                                                                                                                                                                                                                |
| Mental health ambulatory data collections                   | Population         | NSW, VIC, TAS, WA                   | No                                     | No                              |                                                                                                                                                                                                                                                                                                                                                                                                                                                                                                                                                                |
| Alcohol and drug treatment helpline calls                   | Population         | All states/territories              | Depends on the coding system           | No                              |                                                                                                                                                                                                                                                                                                                                                                                                                                                                                                                                                                |
| Needle-syringe programme data                               | High-risk sentinel | National and all states/territories | Depends on the coding system           | No                              |                                                                                                                                                                                                                                                                                                                                                                                                                                                                                                                                                                |
| Medically-supervised injecting clinic data                  | High-risk sentinel | NSW                                 | Depends on the coding system           | No                              |                                                                                                                                                                                                                                                                                                                                                                                                                                                                                                                                                                |
| Prescription monitoring programme data                      | High-risk sentinel | TAS                                 | Yes                                    | Yes                             | Incomplete coverage with continued implementation of the programme, with voluntary opt in by pharmacists and                                                                                                                                                                                                                                                                                                                                                                                                                                                   |



|   |                                          |                    |                                     |     |                                                                                                  |
|---|------------------------------------------|--------------------|-------------------------------------|-----|--------------------------------------------------------------------------------------------------|
|   |                                          |                    |                                     |     | general practitioners, and no requirement for use for every dispensing episode.                  |
| 1 | Pharmacotherapy program data             | Population         | National and all states/territories | Yes | No                                                                                               |
| 2 | Alcohol and drug treatment services data | Population         | National and all states/territories | Yes | No                                                                                               |
| 3 | Arrest data                              | Population         | National and all states/territories | Yes | No                                                                                               |
| 4 | Seizure data                             | Population         | National and all states/territories | Yes | No                                                                                               |
| 5 | Street price data                        | Population         | National and all states/territories | Yes | No                                                                                               |
| 6 | Criminal court data                      | Population         | National and all states/territories | Yes | No                                                                                               |
| 7 | <i>Online Monitoring</i>                 |                    |                                     |     |                                                                                                  |
| 8 | Online marketplace monitoring            | High-risk sentinel | National                            | Yes | Yes                                                                                              |
| 9 |                                          |                    |                                     |     | Gives opioid brand/dose for sale on online marketplaces. Data is only available from early 2013. |

**Note.** <sup>1</sup> National: collated and reported at national level only; National and all states/territories: collated and reported at national and state/territory-level; All states/territories: collated and reported at the state/territory level only. <sup>2</sup> Distinguishes between types of opioids (e.g., morphine and oxycodone). NSW: New South Wales; QLD: Queensland; SA: South Australia; WA: Western Australia; TAS: Tasmania; Australian Capital Territory; VIC: Victoria.
