# Supplementary material for: Opioid use and harms associated with a sustained-release tapentadol formulation: a postmarketing study protocol
Source: PubMed Central journal article supplement — BMJ Open. 2018 Mar 23;8(3):e020006. doi: 10.1136/bmjopen-2017-020006 (PMC5875643; doi:10.1136/bmjopen-2017-020006), 2018-03-23
Supplement: bmjopen-2017-020006supp001.pdf [file bmjopen-2017-020006supp001.pdf]

## Appendix 1. Data Sources Reviewed for Inclusion

| Source                                                      | Sample             | Geographic Coverage <sup>1</sup>    | Distinguishes opioid type <sup>2</sup> | Distinguishes opioid brand      | Comments                                                                                                                                                                                                                                                                                                                                                                                                                                                                                                                                                       |
|-------------------------------------------------------------|--------------------|-------------------------------------|----------------------------------------|---------------------------------|----------------------------------------------------------------------------------------------------------------------------------------------------------------------------------------------------------------------------------------------------------------------------------------------------------------------------------------------------------------------------------------------------------------------------------------------------------------------------------------------------------------------------------------------------------------|
| <i>Annual/Repeated Data Collections</i>                     |                    |                                     |                                        |                                 |                                                                                                                                                                                                                                                                                                                                                                                                                                                                                                                                                                |
| National Drug Strategy Household Survey (NDSHS)             | Population         | National and all states/territories | Yes                                    | No                              |                                                                                                                                                                                                                                                                                                                                                                                                                                                                                                                                                                |
| National Survey of Mental Health and Wellbeing (NSMHWB)     | Population         | National and all states/territories | No                                     | No                              |                                                                                                                                                                                                                                                                                                                                                                                                                                                                                                                                                                |
| Wastewater data                                             | Population         | National and all states/territories | Yes                                    | No                              |                                                                                                                                                                                                                                                                                                                                                                                                                                                                                                                                                                |
| Ecstasy and Related Drug Reporting System (EDRS) interviews | High-risk sentinel | National and all states/territories | Yes                                    | No                              |                                                                                                                                                                                                                                                                                                                                                                                                                                                                                                                                                                |
| Illicit Drug Reporting System (IDRS) interviews             | High-risk sentinel | National and all states/territories | Yes                                    | Yes                             | Gives opioid type, strength and brand, and includes OTC codeine. Data available from 2017 only                                                                                                                                                                                                                                                                                                                                                                                                                                                                 |
| Drug Use Monitoring in Australia (DUMA)                     | High-risk sentinel | NSW, QLD, SA, WA                    | Yes                                    | No                              |                                                                                                                                                                                                                                                                                                                                                                                                                                                                                                                                                                |
| Australian NSP survey                                       | High-risk sentinel | National and all states/territories | Yes                                    | No                              |                                                                                                                                                                                                                                                                                                                                                                                                                                                                                                                                                                |
| Women and Sexual Health Survey (SWASH)                      | High-risk sentinel | NSW and WA                          | No                                     | No                              |                                                                                                                                                                                                                                                                                                                                                                                                                                                                                                                                                                |
| Gay Community Periodic Survey                               | High-risk sentinel | SA, ACT, VIC, WA, QLD, NSW, TAS     | No                                     | No                              |                                                                                                                                                                                                                                                                                                                                                                                                                                                                                                                                                                |
| <i>Sales and Dispensing Data Collections</i>                |                    |                                     |                                        |                                 |                                                                                                                                                                                                                                                                                                                                                                                                                                                                                                                                                                |
| Prescription sales data                                     | Population         | National and all states/territories | Yes                                    | Yes                             | Gives opioid type, strength and brand, and includes OTC codeine                                                                                                                                                                                                                                                                                                                                                                                                                                                                                                |
| Pharmaceutical Benefits Scheme                              | Population         | National and all states/territories | Yes                                    | Depends on the opioid type/dose | Item codes for pharmaceutical opioids (the unit by which data can be extracted) do not differentiate by brand where multiple brands offer products of the same strength (e.g., four different brands of morphine products fall under item code '1653B: morphine sulfate 10mg modified release tablet') <sup>30</sup> . Further, only medicines contained in the Schedule of Pharmaceutical Benefits appear in these statistics (excluding over-the-counter codeine), and SRF tapentadol was only listed on the Schedule two years post-introduction (in 2013). |
| Medicare Benefits Scheme                                    | Population         | National and all states/territories | No                                     | No                              |                                                                                                                                                                                                                                                                                                                                                                                                                                                                                                                                                                |
| <i>Administrative Data Collections</i>                      |                    |                                     |                                        |                                 |                                                                                                                                                                                                                                                                                                                                                                                                                                                                                                                                                                |
| Poison Information Centre call data                         | Population         | All states/territories              | Yes                                    | Yes                             | Gives opioid type, strength and brand where these characteristics can be identified by the caller, and includes OTC codeine                                                                                                                                                                                                                                                                                                                                                                                                                                    |
| Ambulance data collections                                  | Population         | All states/territories              | No                                     | No                              |                                                                                                                                                                                                                                                                                                                                                                                                                                                                                                                                                                |
| Emergency department data collections                       | Population         | All states/territories              | Depends on the coding system           | No                              |                                                                                                                                                                                                                                                                                                                                                                                                                                                                                                                                                                |
| Admitted patient data collections                           | Population         | National and all states/territories | No                                     | No                              |                                                                                                                                                                                                                                                                                                                                                                                                                                                                                                                                                                |
| Mortality data                                              | Population         | National and all states/territories | No                                     | No                              |                                                                                                                                                                                                                                                                                                                                                                                                                                                                                                                                                                |
| Mental health ambulatory data collections                   | Population         | NSW, VIC, TAS, WA                   | No                                     | No                              |                                                                                                                                                                                                                                                                                                                                                                                                                                                                                                                                                                |
| Alcohol and drug treatment helpline calls                   | Population         | All states/territories              | Depends on the coding system           | No                              |                                                                                                                                                                                                                                                                                                                                                                                                                                                                                                                                                                |
| Needle-syringe programme data                               | High-risk sentinel | National and all states/territories | Depends on the coding system           | No                              |                                                                                                                                                                                                                                                                                                                                                                                                                                                                                                                                                                |
| Medically-supervised injecting clinic data                  | High-risk sentinel | NSW                                 | Depends on the coding system           | No                              |                                                                                                                                                                                                                                                                                                                                                                                                                                                                                                                                                                |
| Prescription monitoring programme data                      | High-risk sentinel | TAS                                 | Yes                                    | Yes                             | Incomplete coverage with continued implementation of the programme, with voluntary opt in by pharmacists and                                                                                                                                                                                                                                                                                                                                                                                                                                                   |

|                                          |                    |                                     |     |     |                                                                                                  |
|------------------------------------------|--------------------|-------------------------------------|-----|-----|--------------------------------------------------------------------------------------------------|
|                                          |                    |                                     |     |     | general practitioners, and no requirement for use for every dispensing episode.                  |
| Pharmacotherapy program data             | Population         | National and all states/territories | Yes | No  |                                                                                                  |
| Alcohol and drug treatment services data | Population         | National and all states/territories | Yes | No  |                                                                                                  |
| Arrest data                              | Population         | National and all states/territories | Yes | No  |                                                                                                  |
| Seizure data                             | Population         | National and all states/territories | Yes | No  |                                                                                                  |
| Street price data                        | Population         | National and all states/territories | Yes | No  |                                                                                                  |
| Criminal court data                      | Population         | National and all states/territories | Yes | No  |                                                                                                  |
| <i>Online Monitoring</i>                 |                    |                                     |     |     |                                                                                                  |
| Online marketplace monitoring            | High-risk sentinel | National                            | Yes | Yes | Gives opioid brand/dose for sale on online marketplaces. Data is only available from early 2013. |

**Note.** <sup>1</sup> National: collated and reported at national level only; National and all states/territories: collated and reported at national and state/territory-level; All states/territories: collated and reported at the state/territory level only. <sup>2</sup> Distinguishes between types of opioids (e.g., morphine and oxycodone). NSW: New South Wales; QLD: Queensland; SA: South Australia; WA: Western Australia; TAS: Tasmania; Australian Capital Territory; VIC: Victoria.
